# Supplementary material for: Nickel-catalyzed reductive coupling of arylcarboxylic acid 2-pyridyl esters with alkyl methanesulfonates: access to alkyl aryl ketones
Source: Royal Society of Chemistry journal article supplement (doi:10.1039/d3ob00293d), 2023-01-01

Electronic Supplementary Information

## **Nickel-catalyzed reductive coupling of arylcarboxylic acid 2-pyridyl esters with alkyl methanesulfonates: access to alkyl aryl ketones**

Hang Yu and Zhong-Xia Wang\*

Copies of NMR spectra of the coupling products

(1) 4-phenyl-1-(*p*-tolyl)butan-1-one (**3aa**)

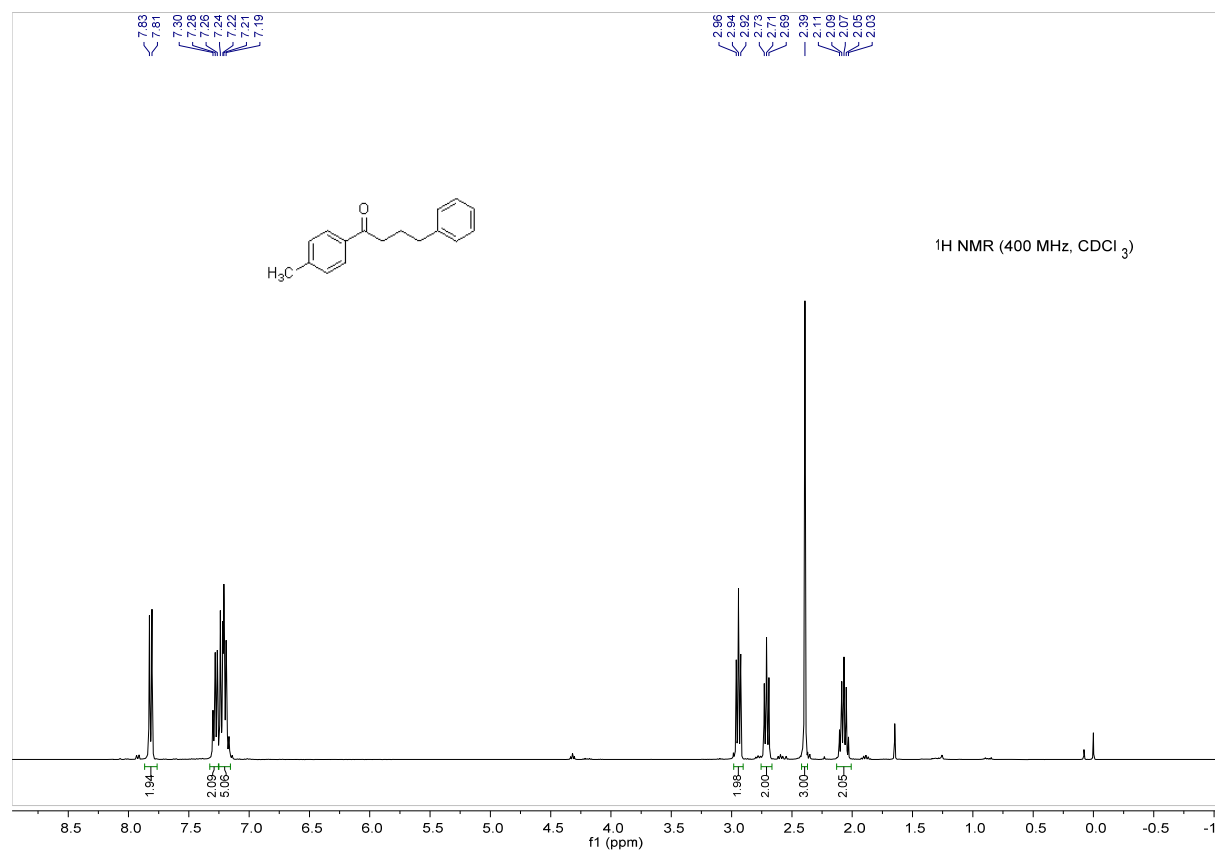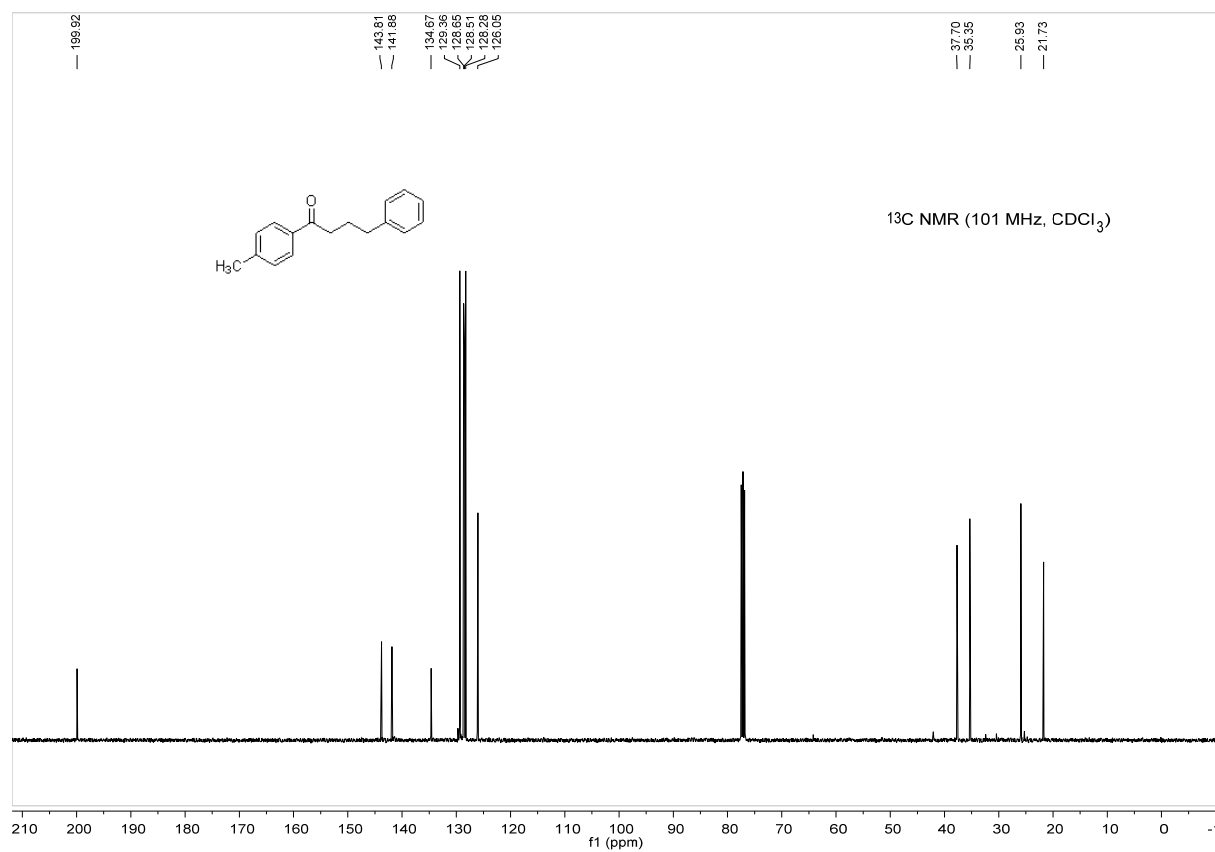

(2) 1,4-diphenylbutan-1-one (**3ab**)

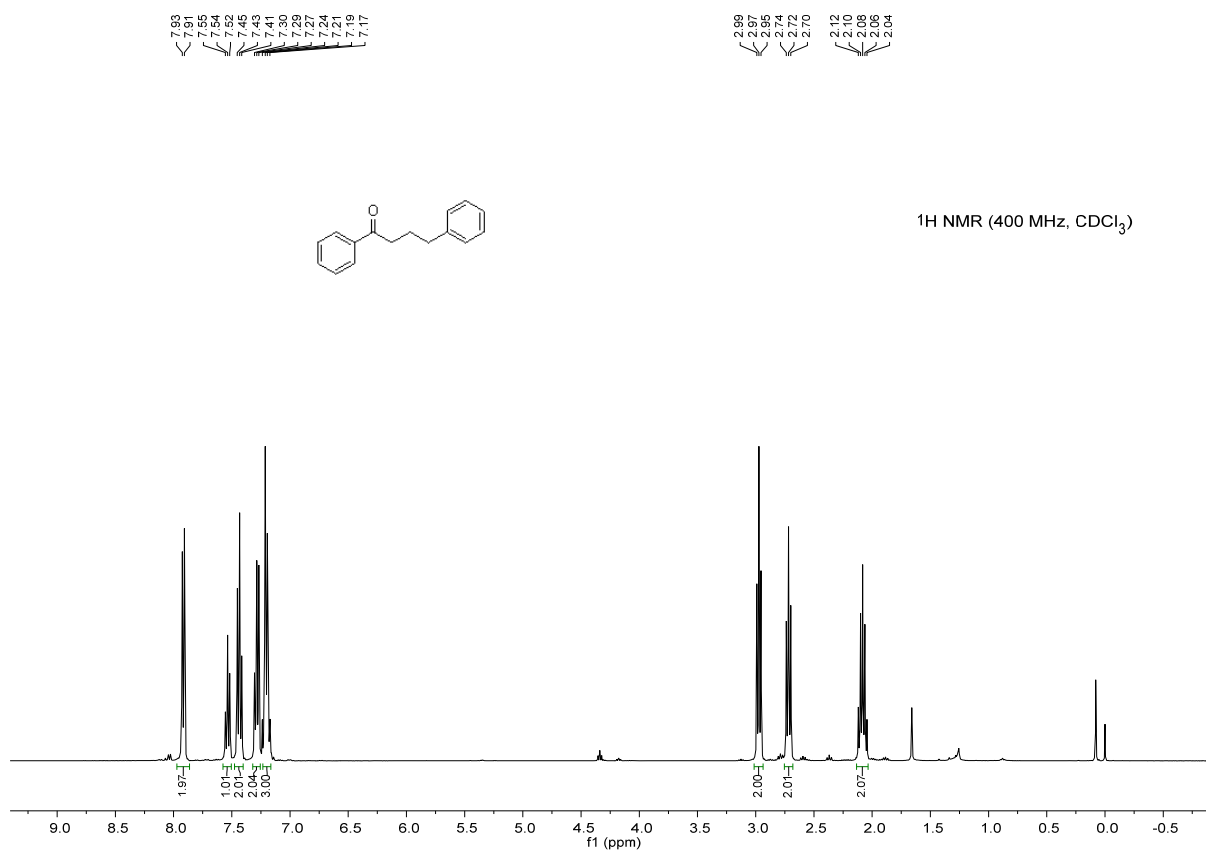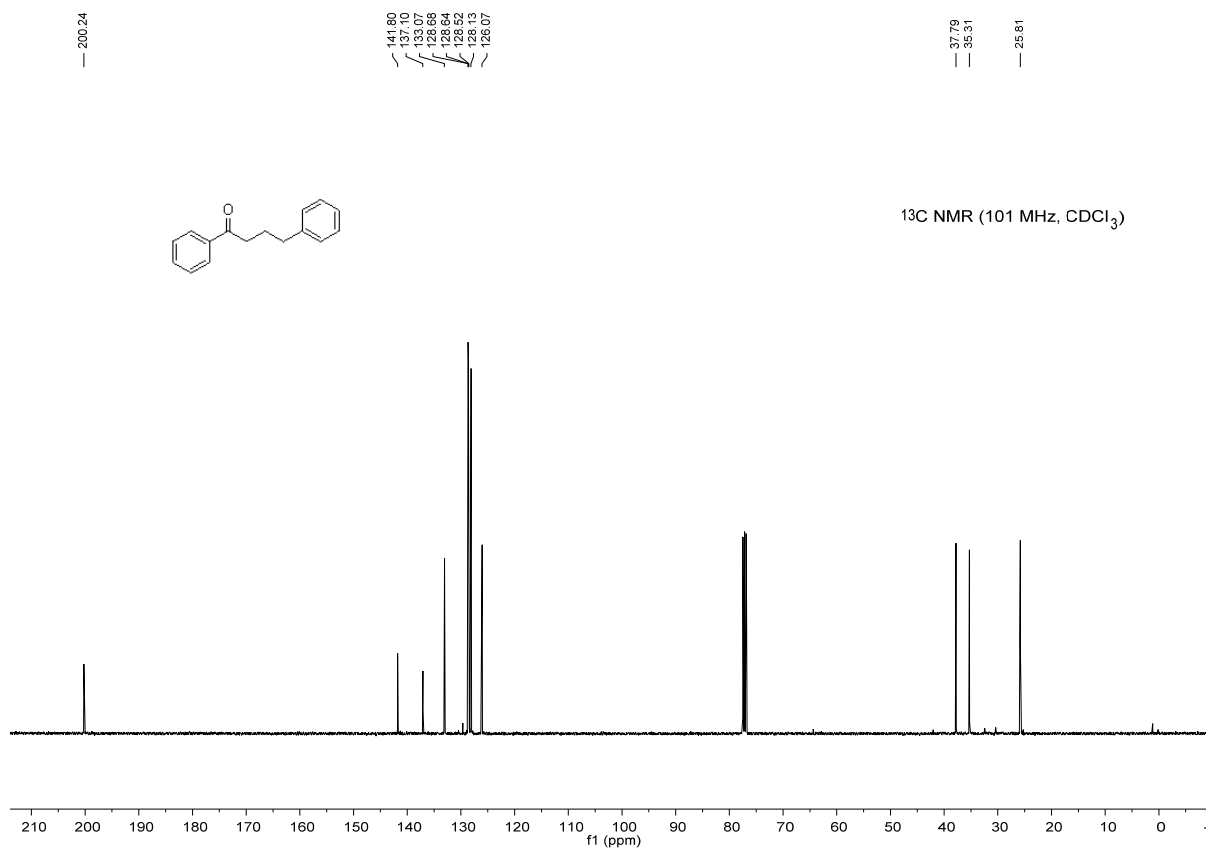

(3) 4-phenyl-1-(*m*-tolyl)butan-1-one (**3ac**)

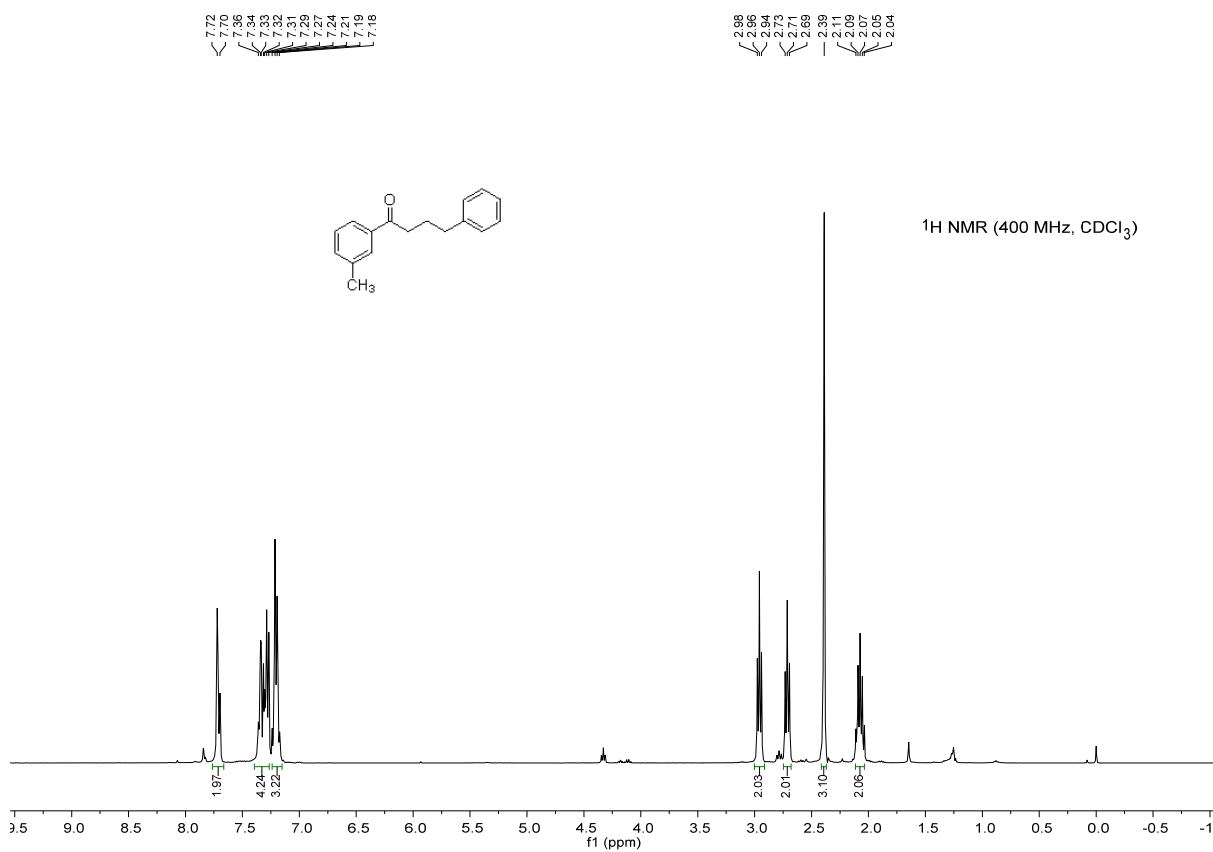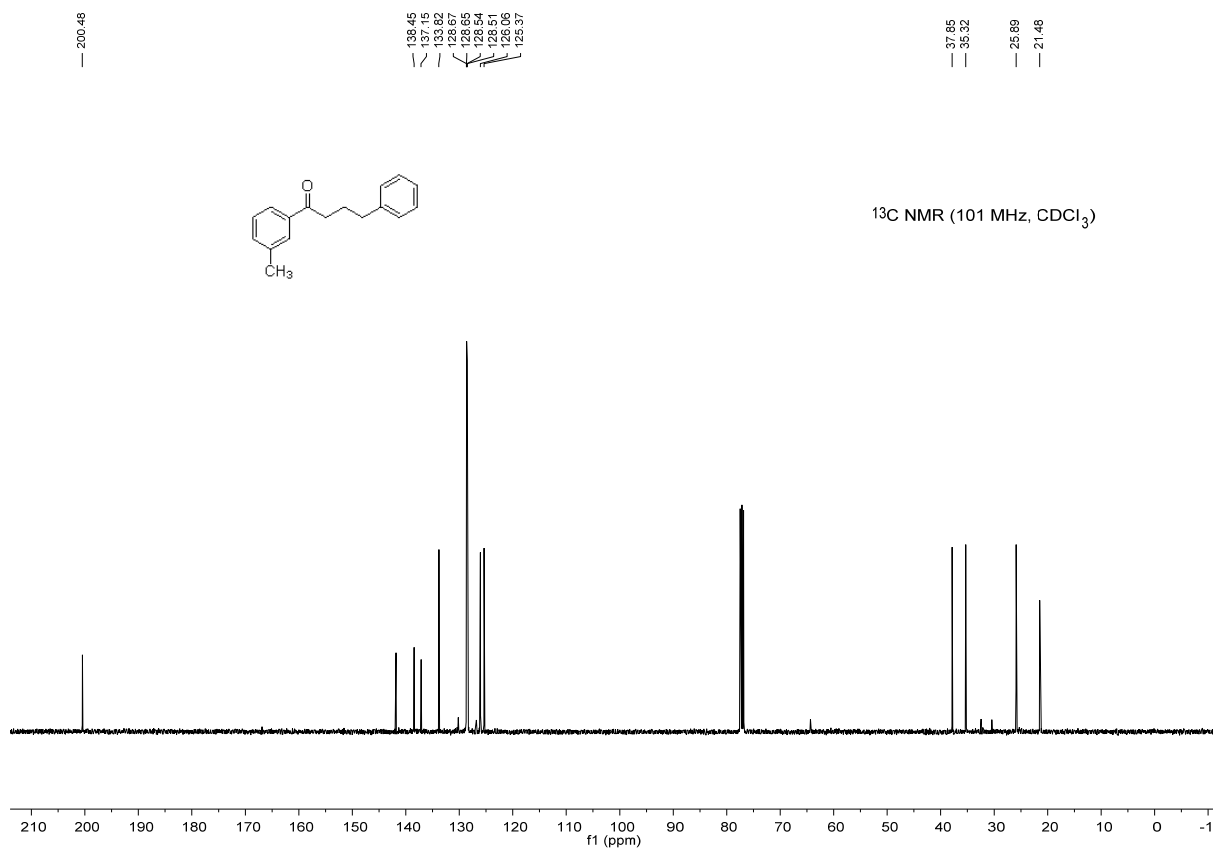

(4) 1-(4-(*tert*-butyl)phenyl)-4-phenylbutan-1-one (**3ad**)

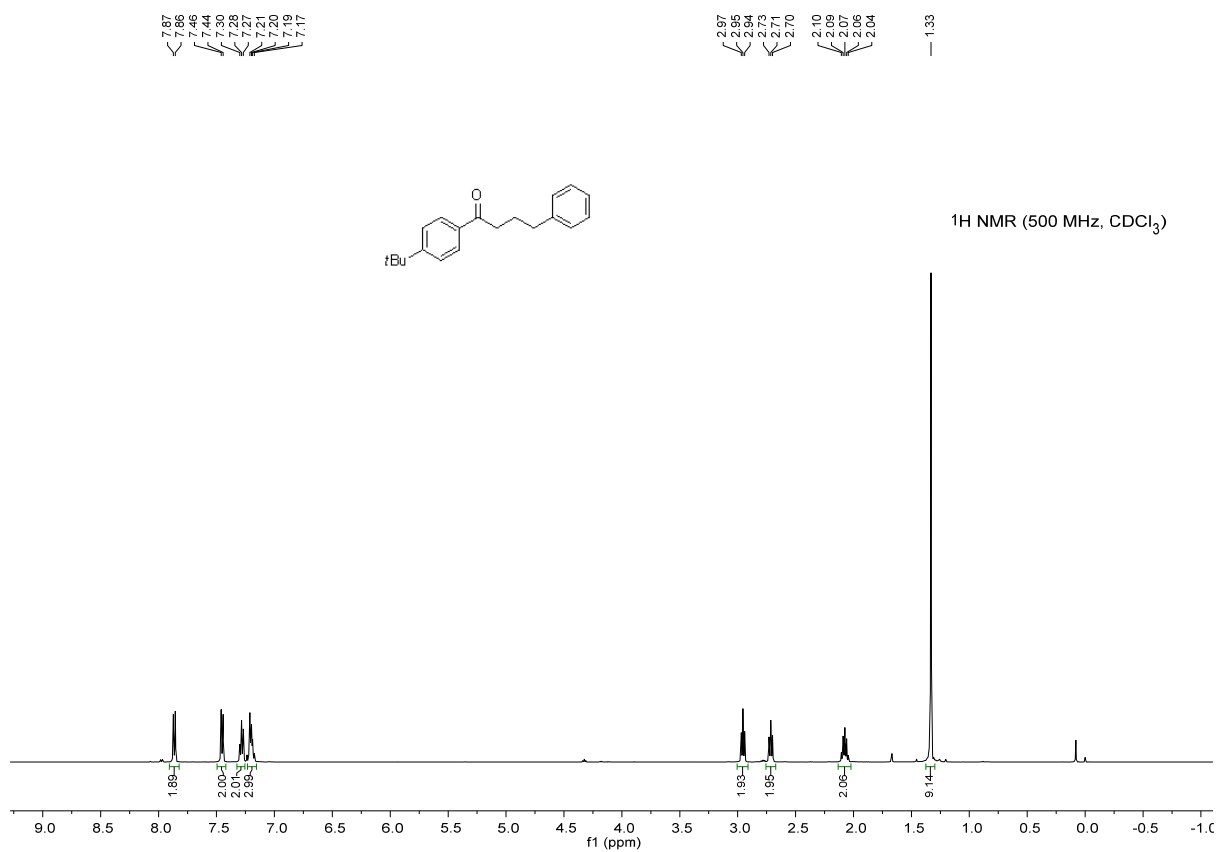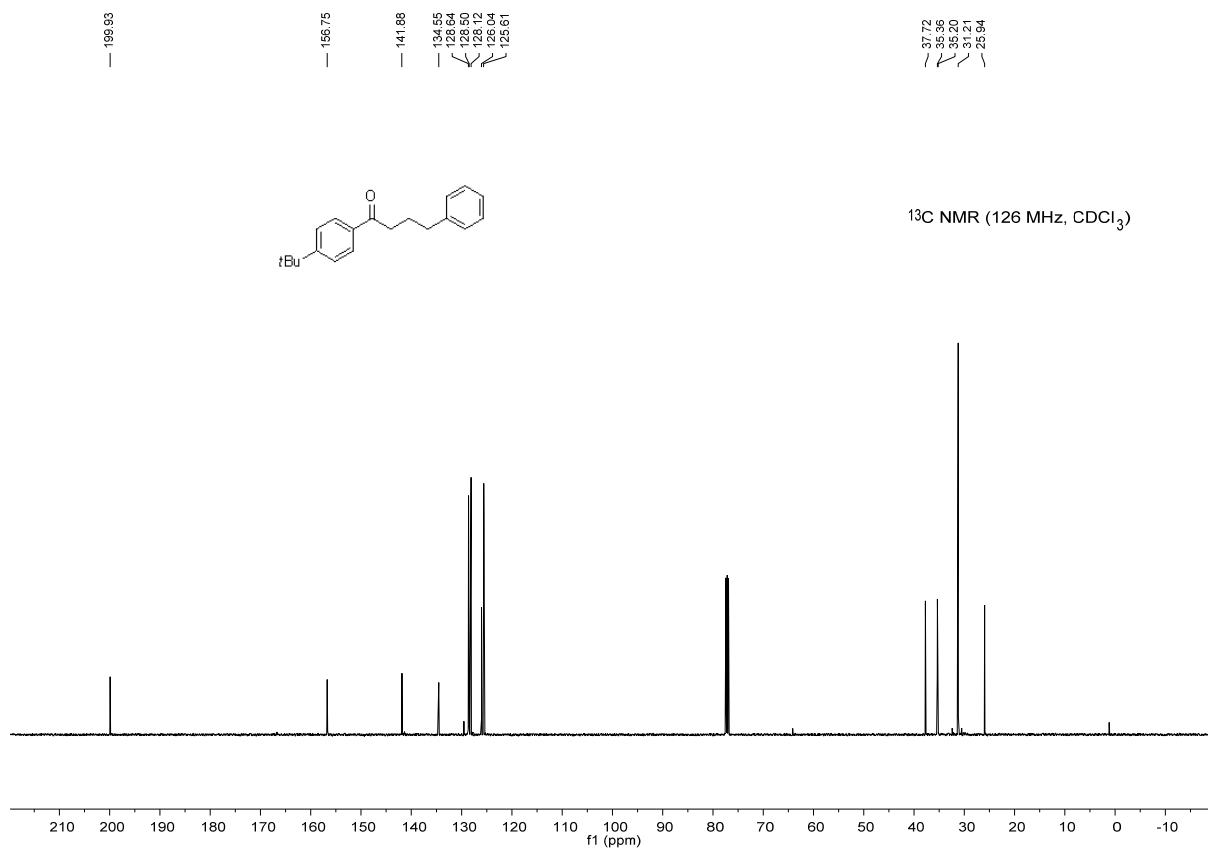

(5) 1-(4-methoxyphenyl)-4-phenylbutan-1-one (**3ae**)

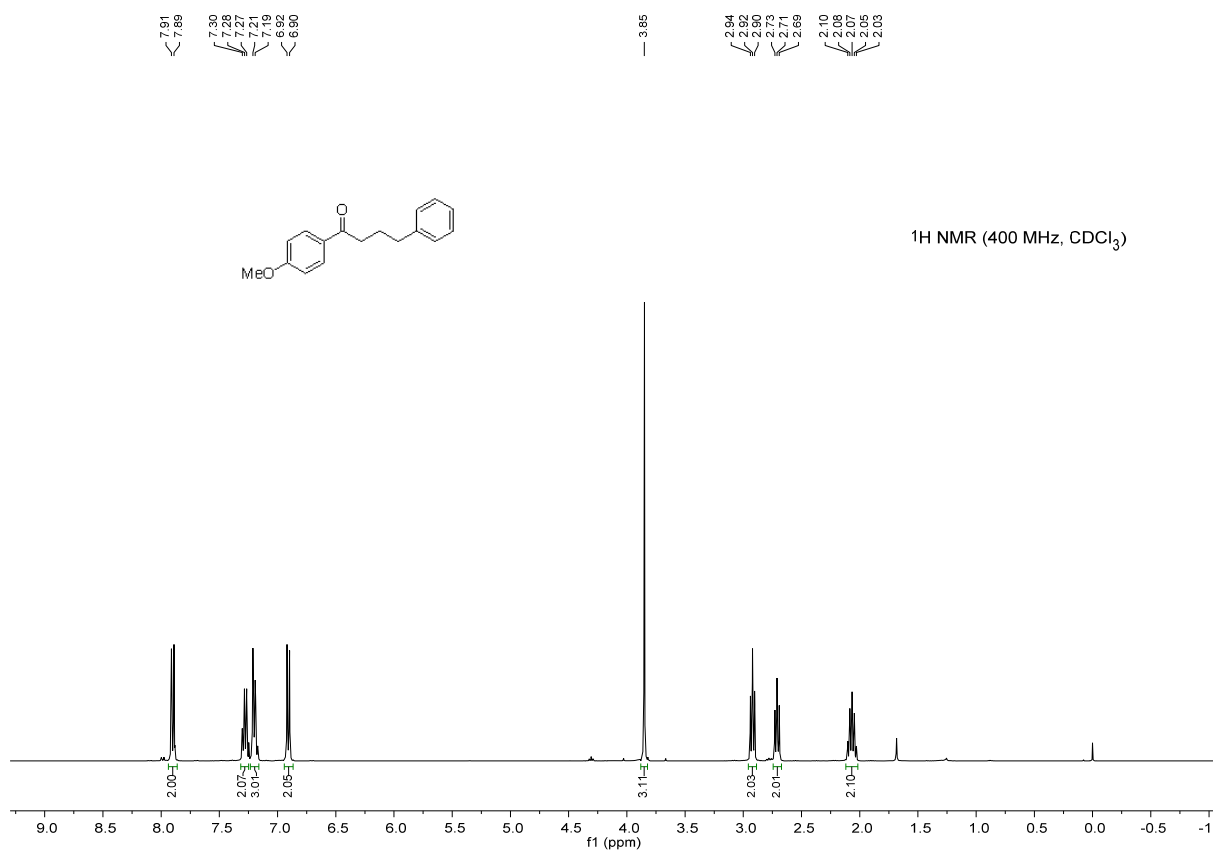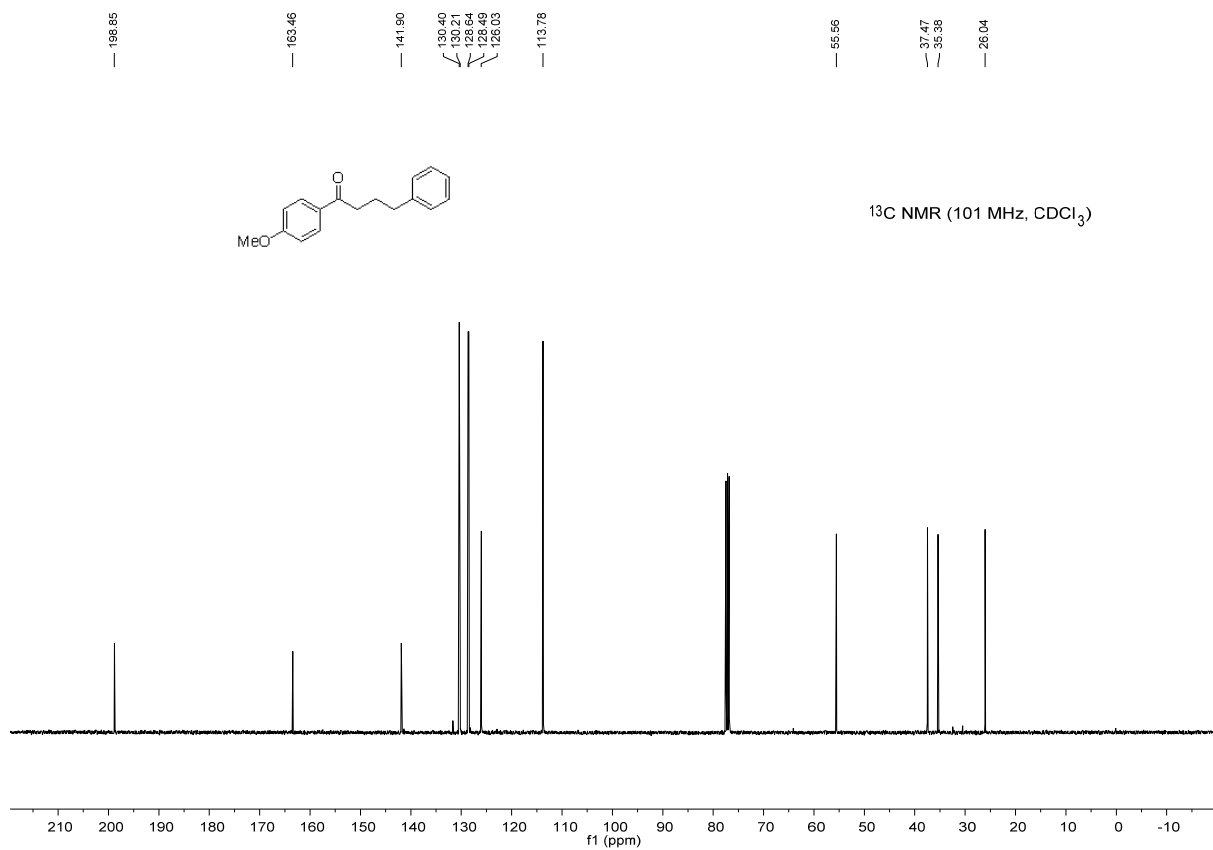

(6) 1-(4-(methylthio)phenyl)-4-phenylbutan-1-one (**3af**)

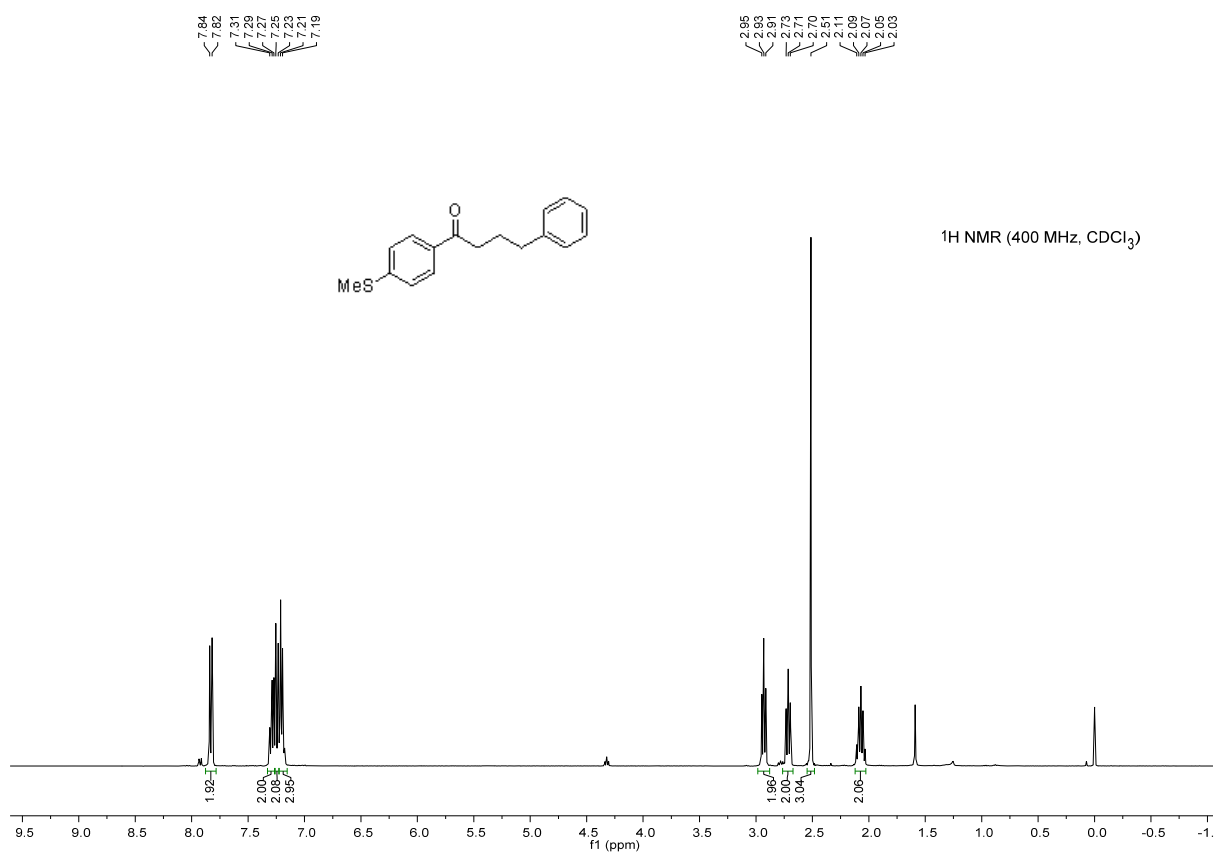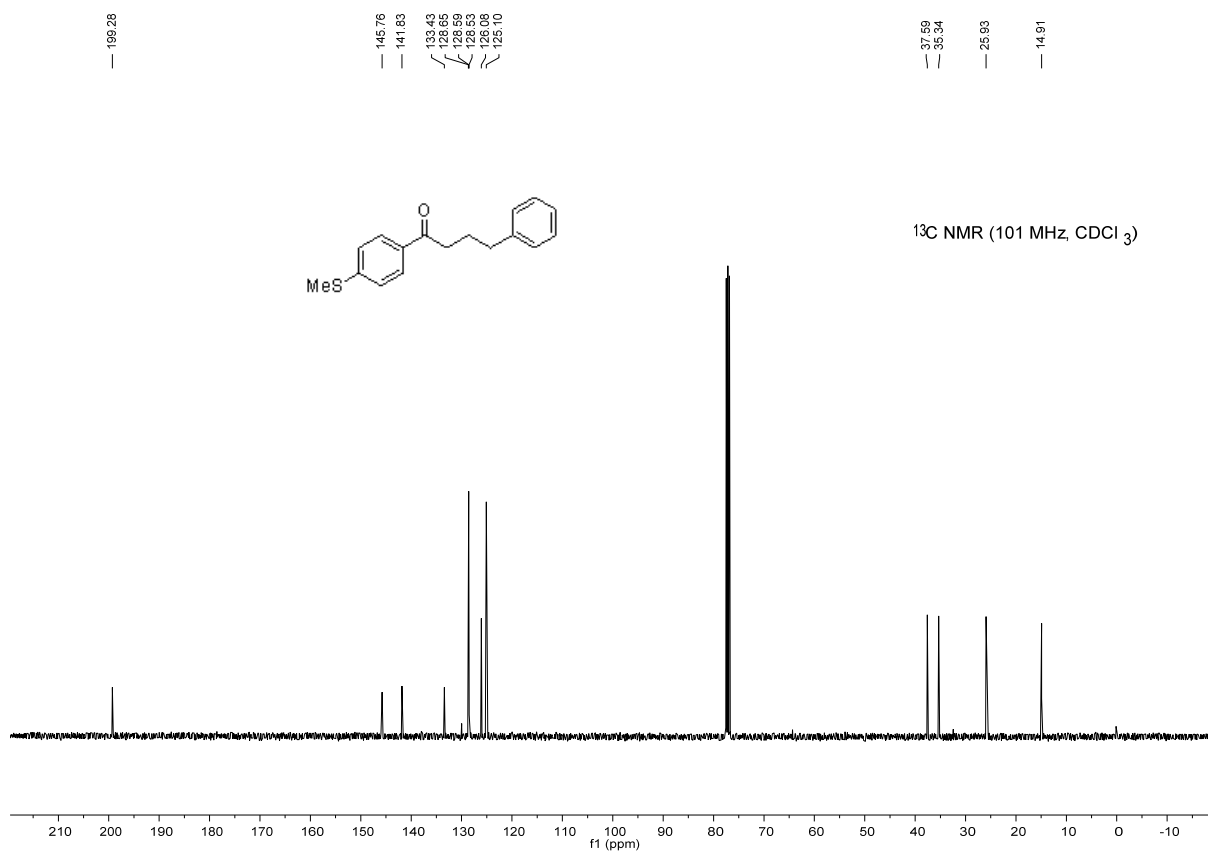

(7) 1-(3,4-dimethoxyphenyl)-4-phenylbutan-1-one (**3ag**)

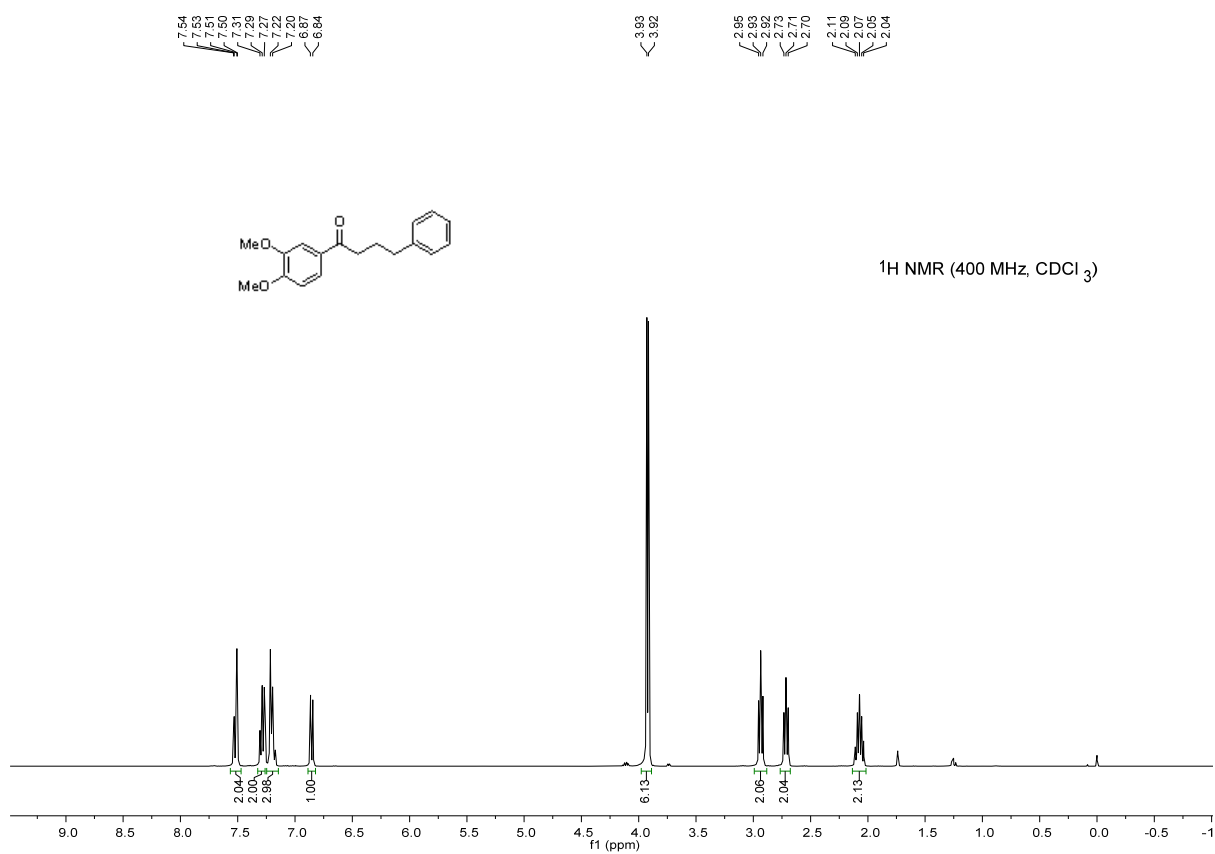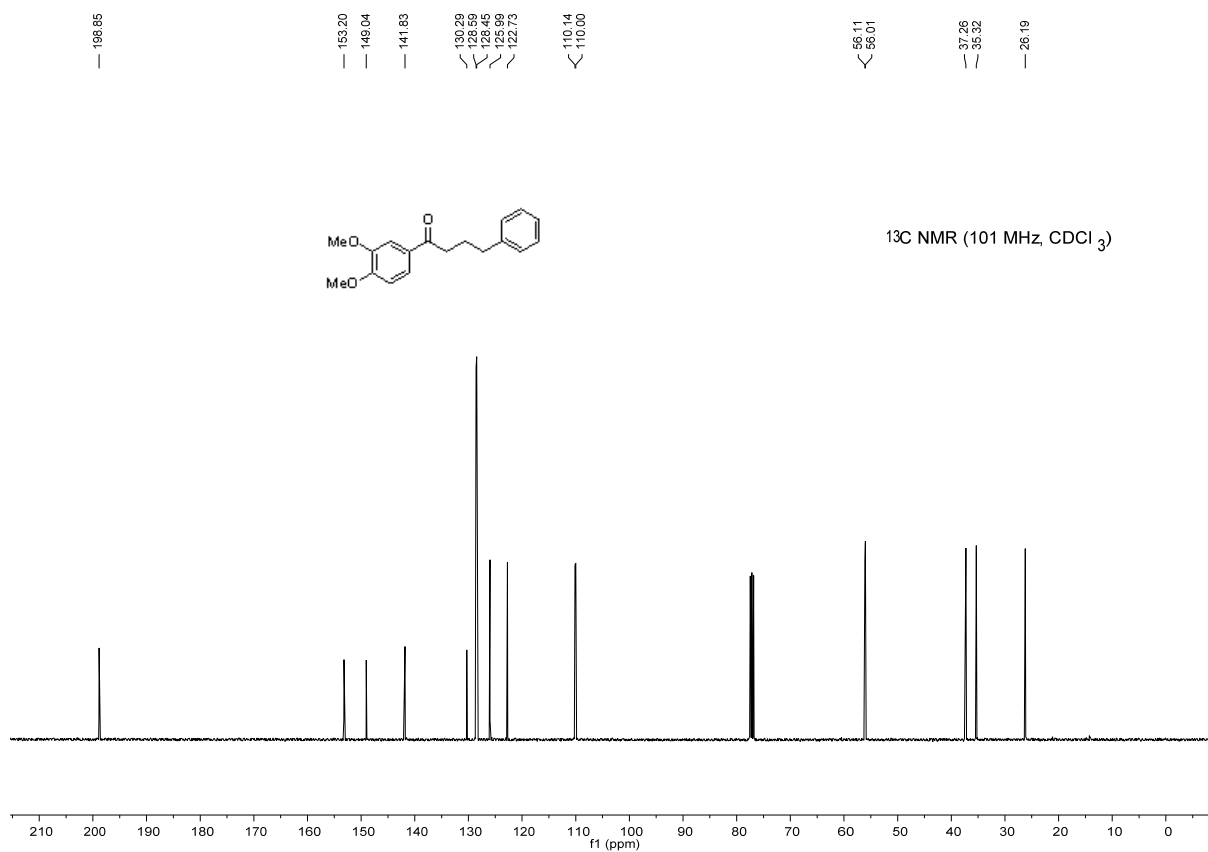



(8) 1-(benzo[d][1,3]dioxol-5-yl)-4-phenylbutan-1-one (**3ah**)

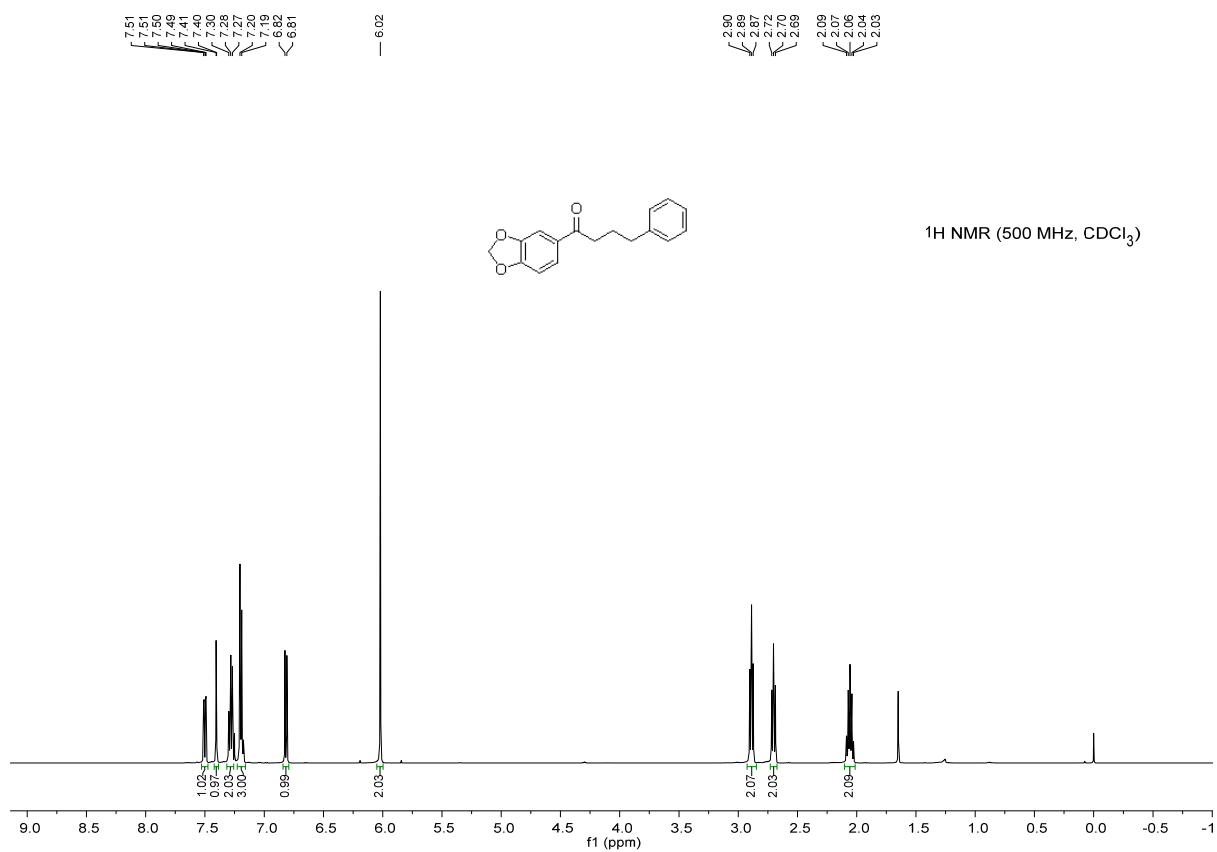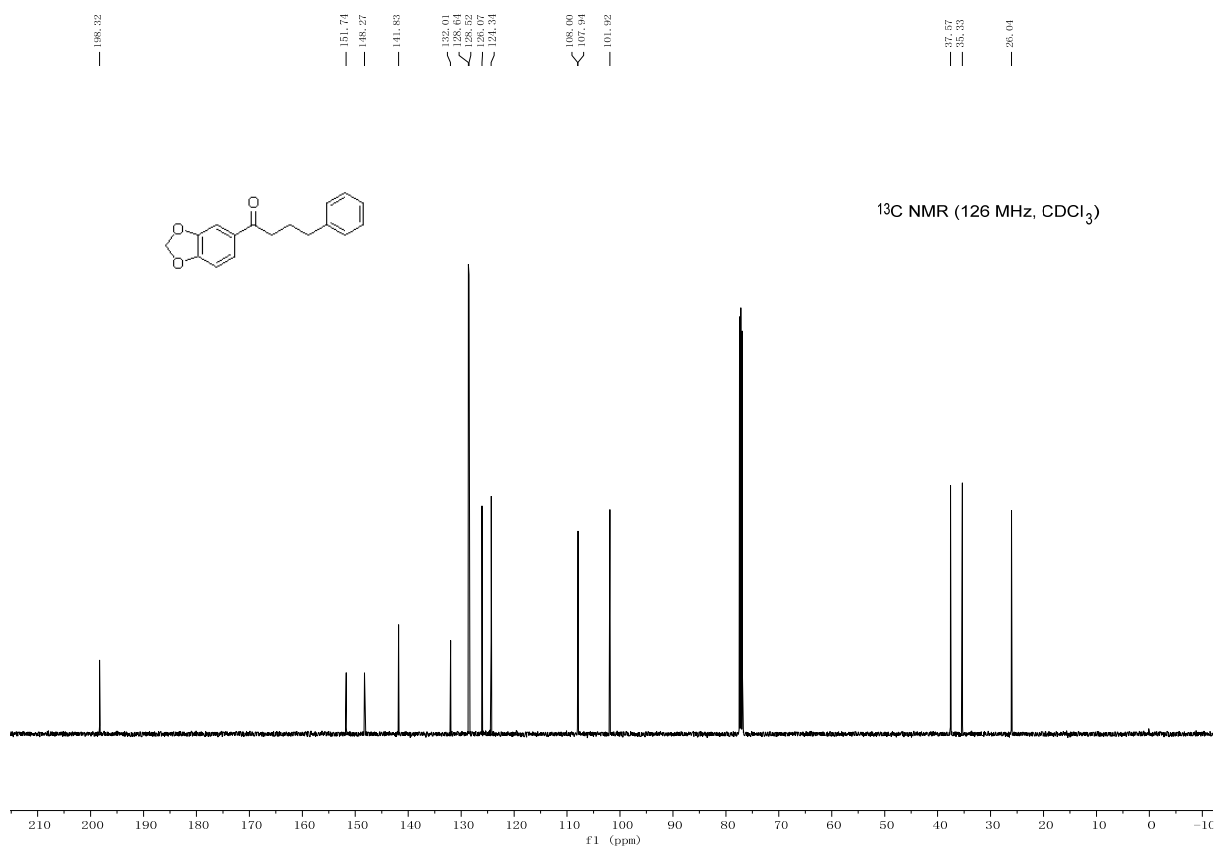

(9) 1-(3-chloro-4-methoxyphenyl)-4-phenylbutan-1-one (**3ai**)

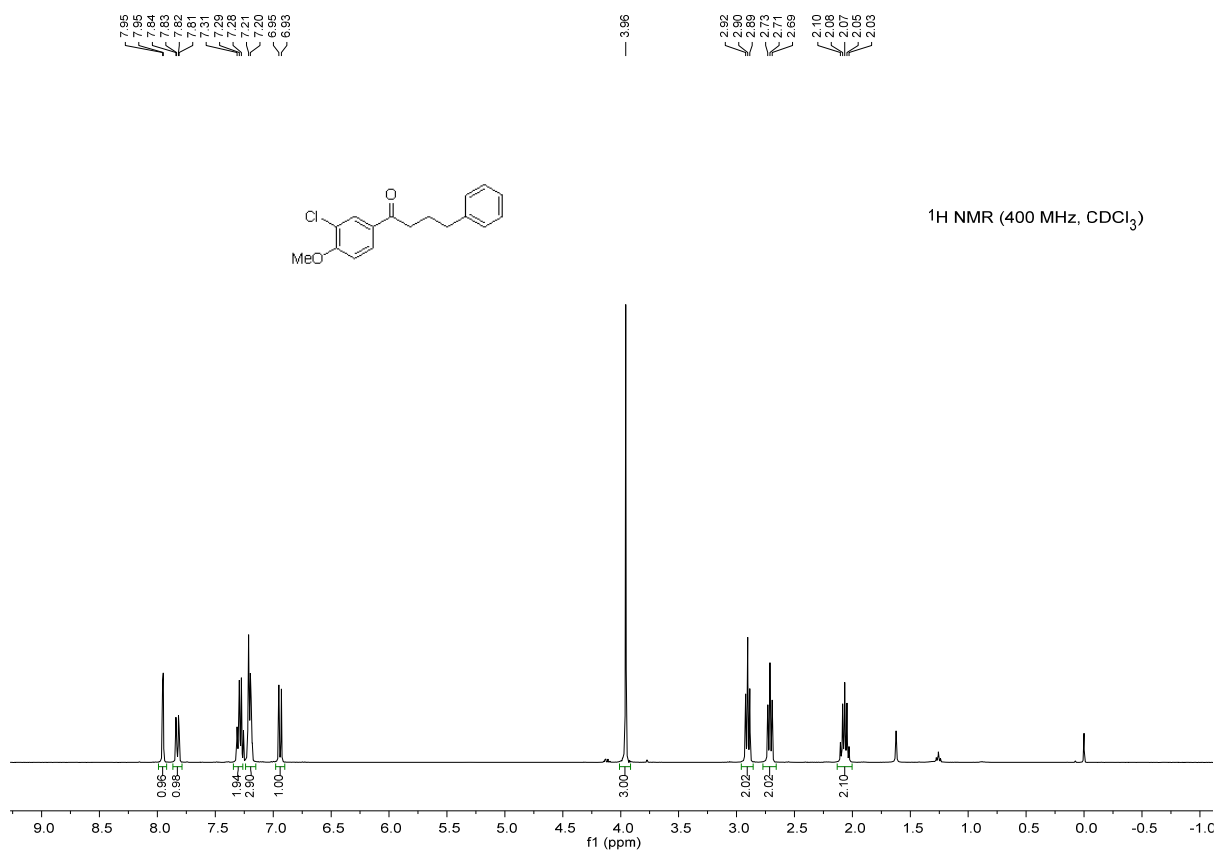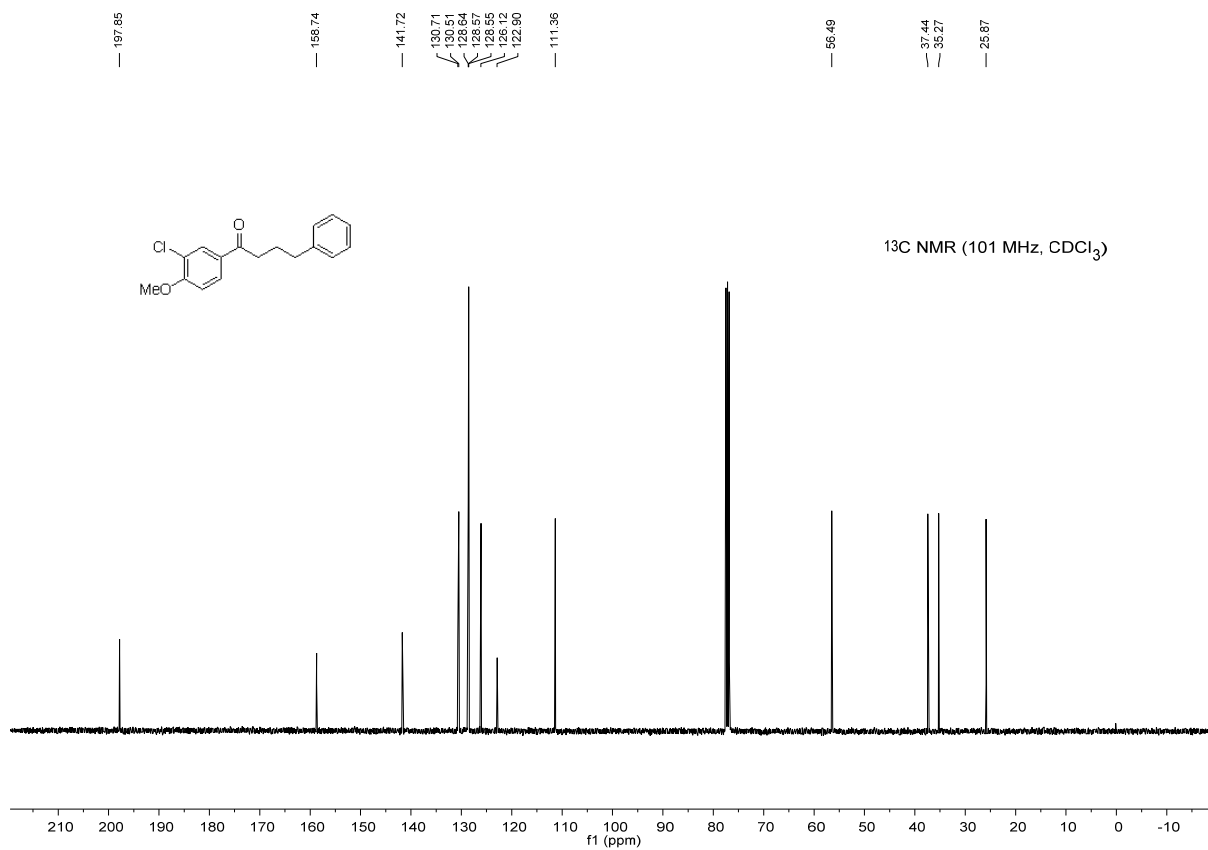

(10) (i) 1-(4-acetylphenyl)-4-phenylbutan-1-one (**3al**)

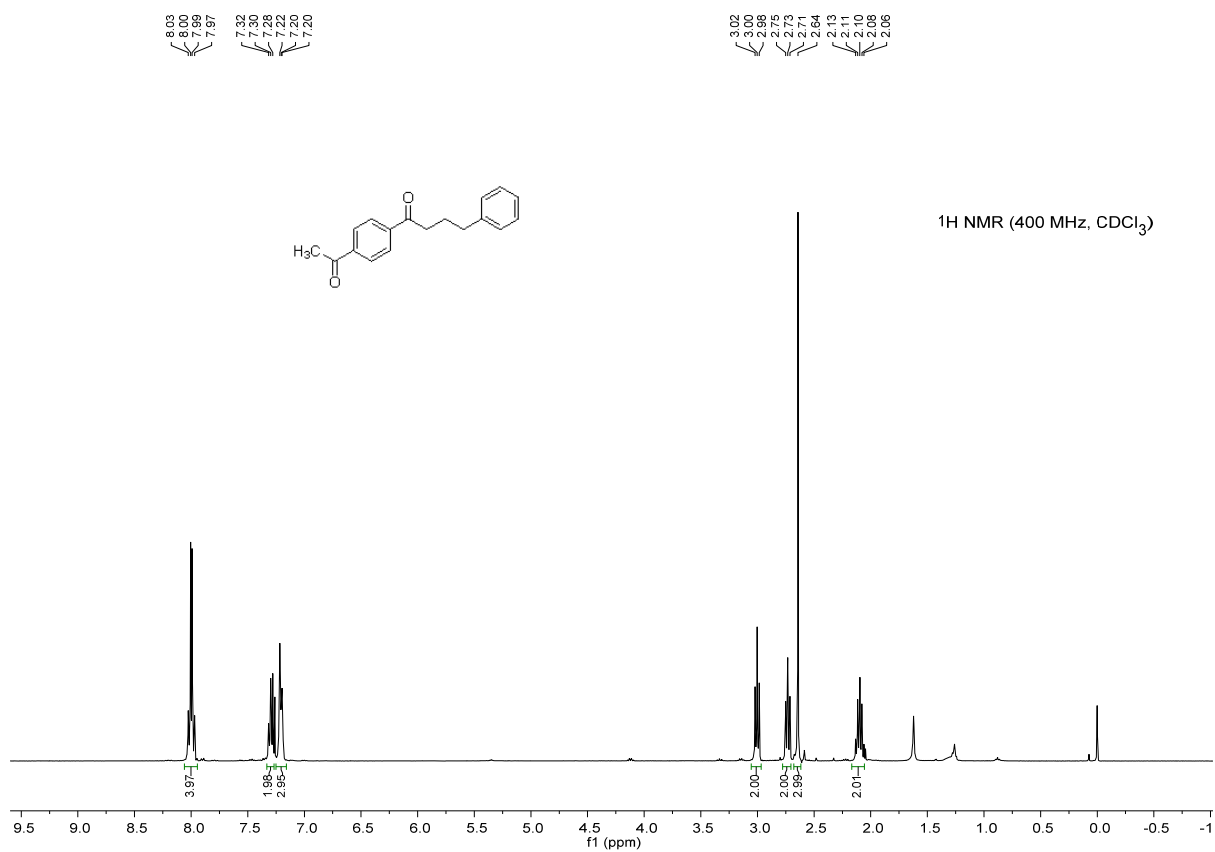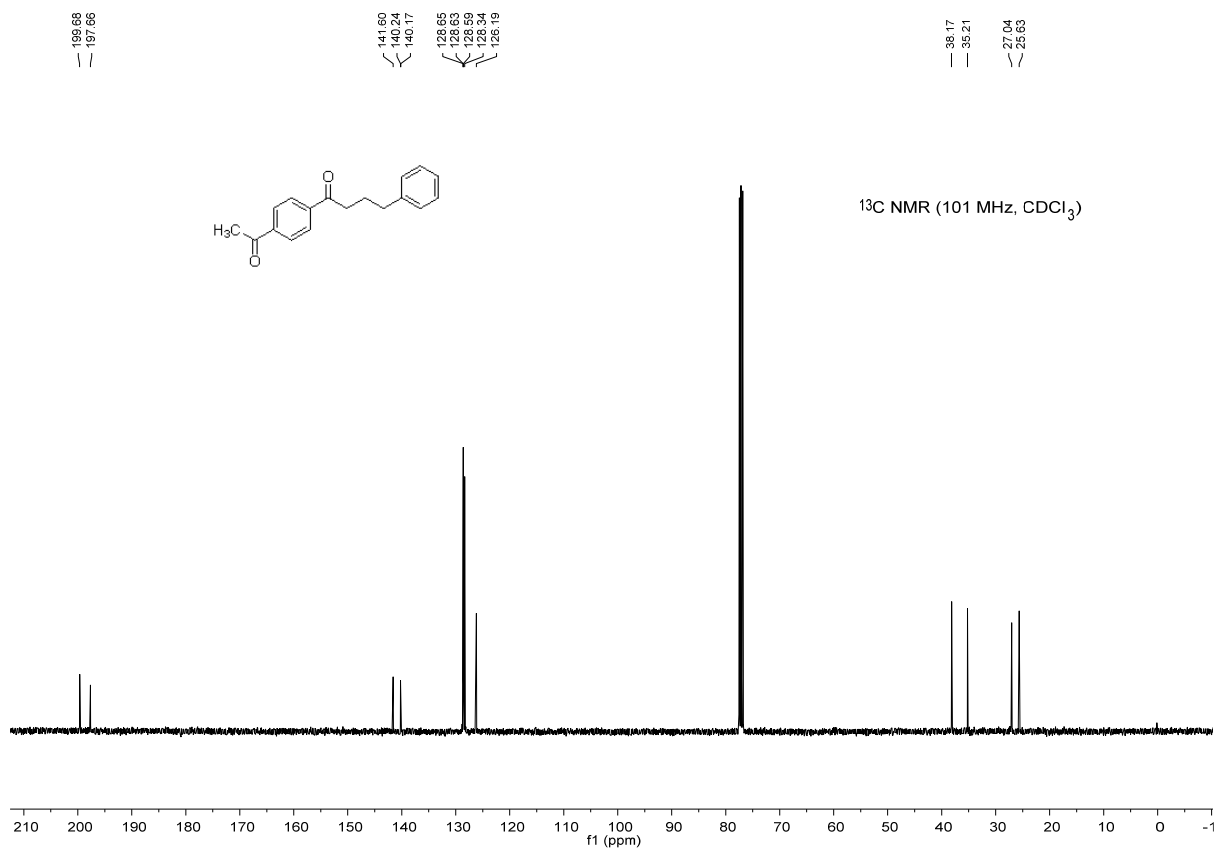

(10) (ii) 3-phenylpropyl 4-acetylbenzoate (**3al'**)

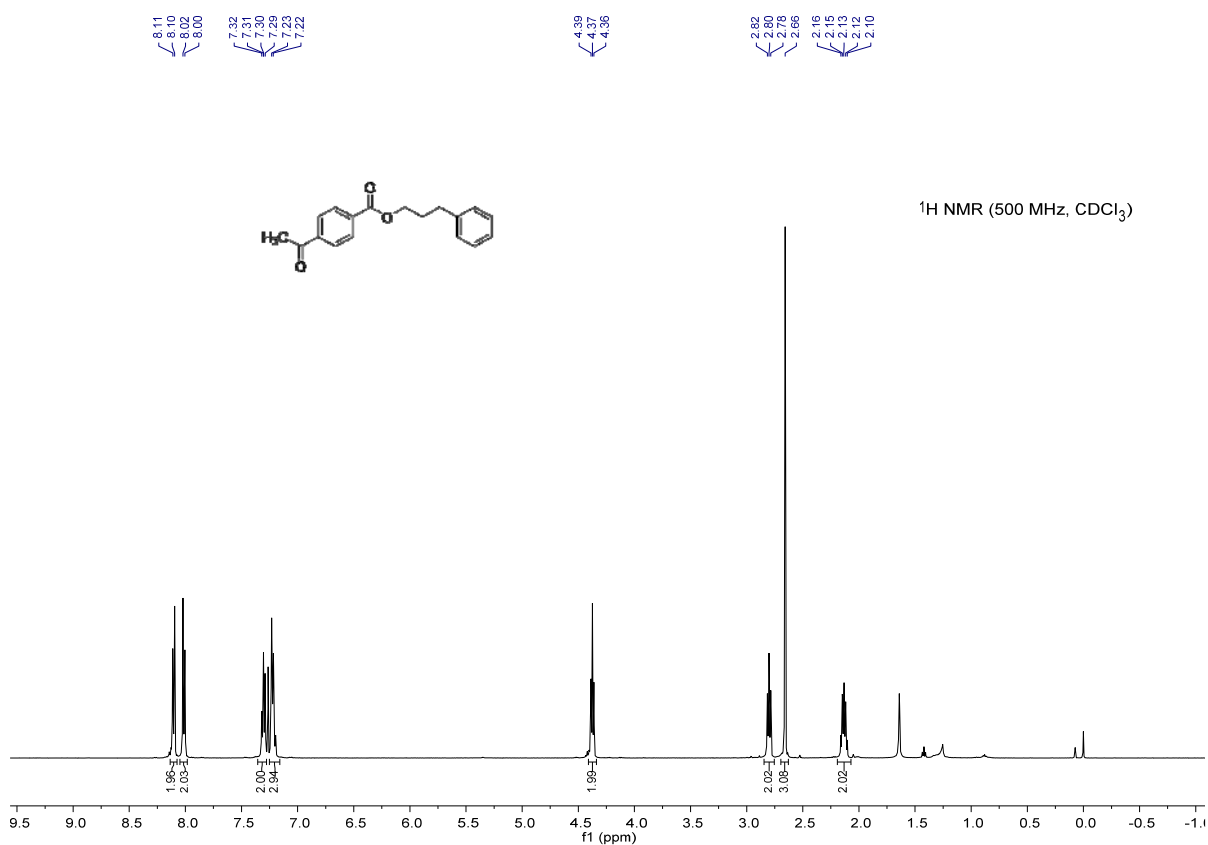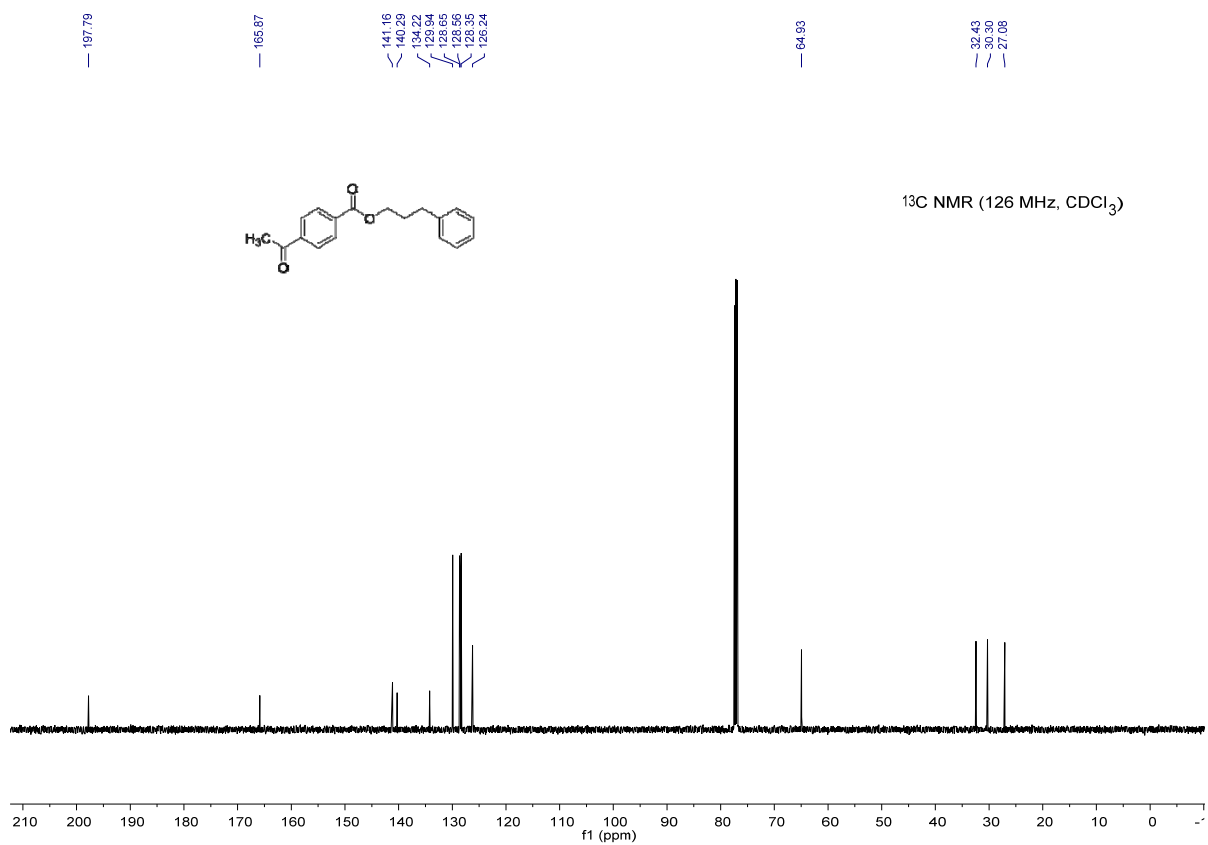

(11) 1-(benzofuran-5-yl)-4-phenylbutan-1-one (**3am**)

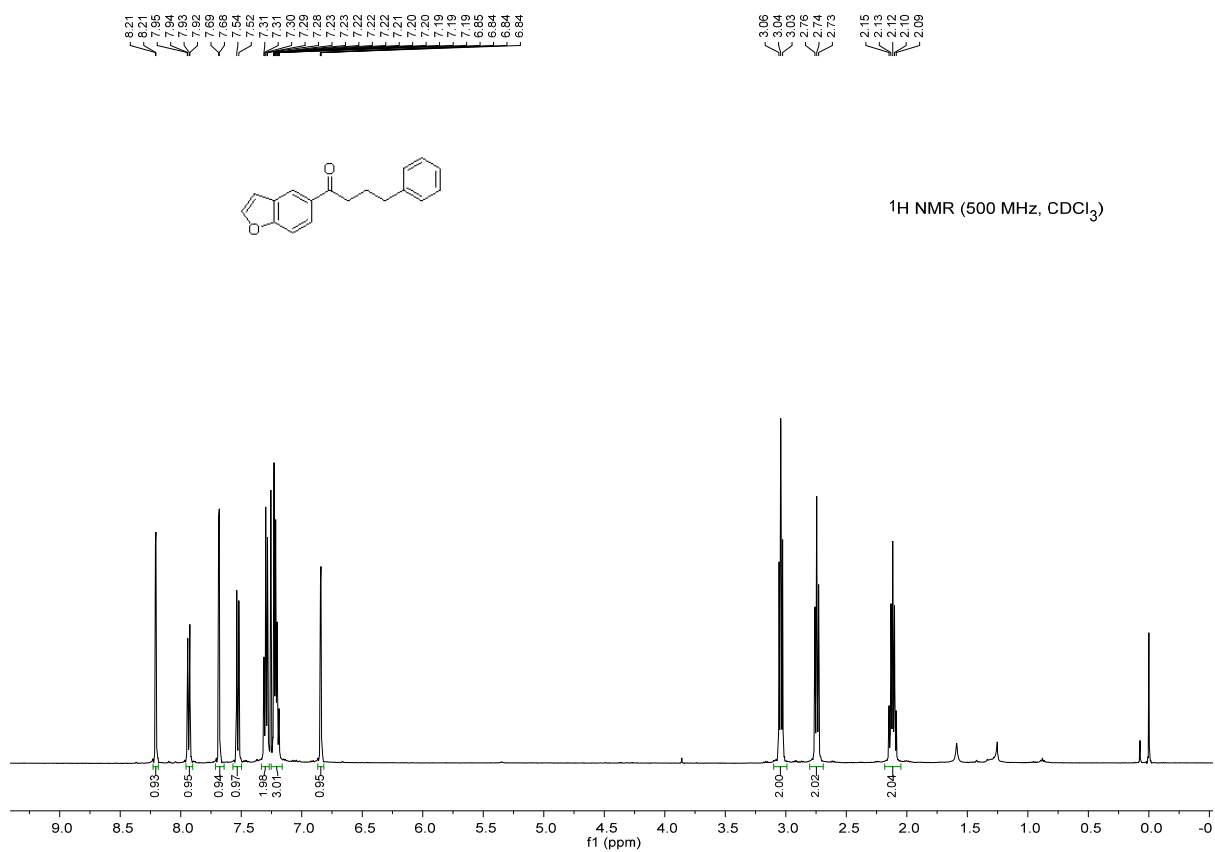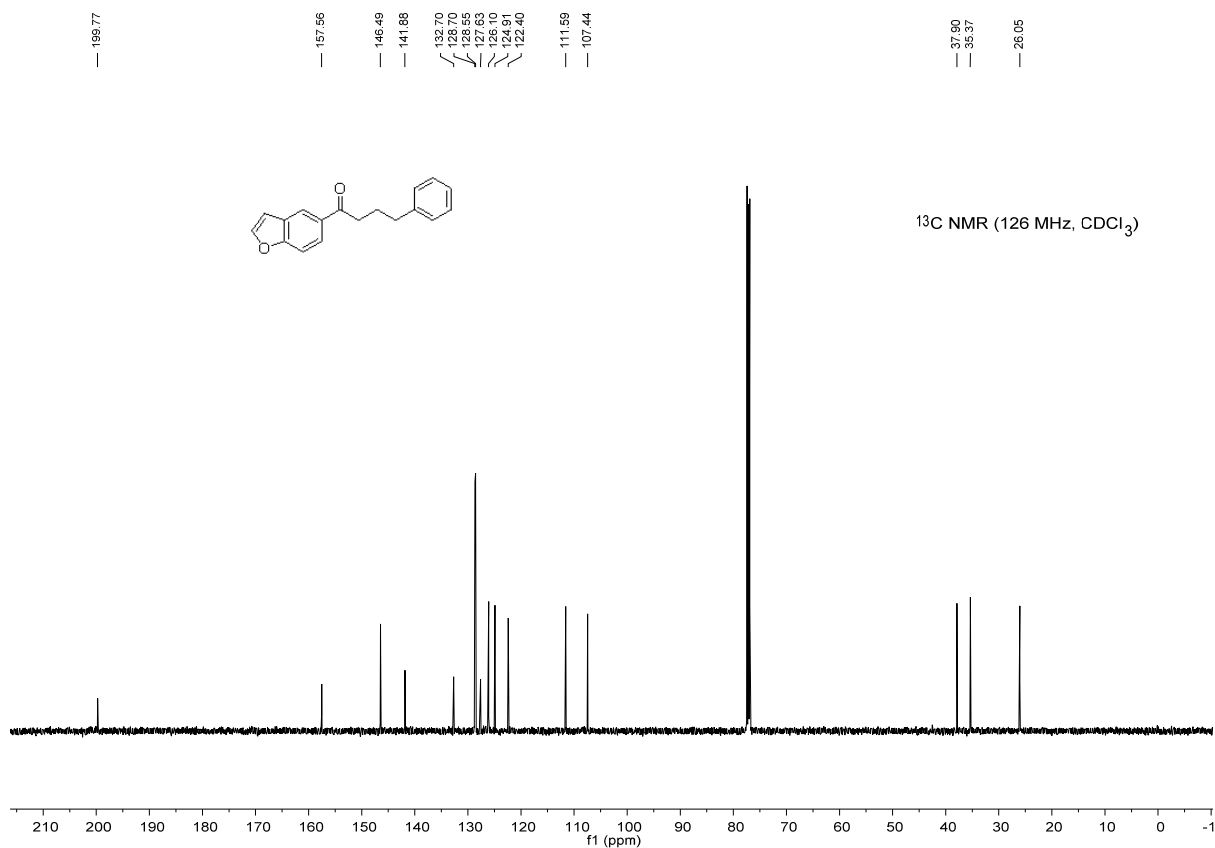

(12) 1-(*p*-tolyl)ethan-1-one (**3ba**)

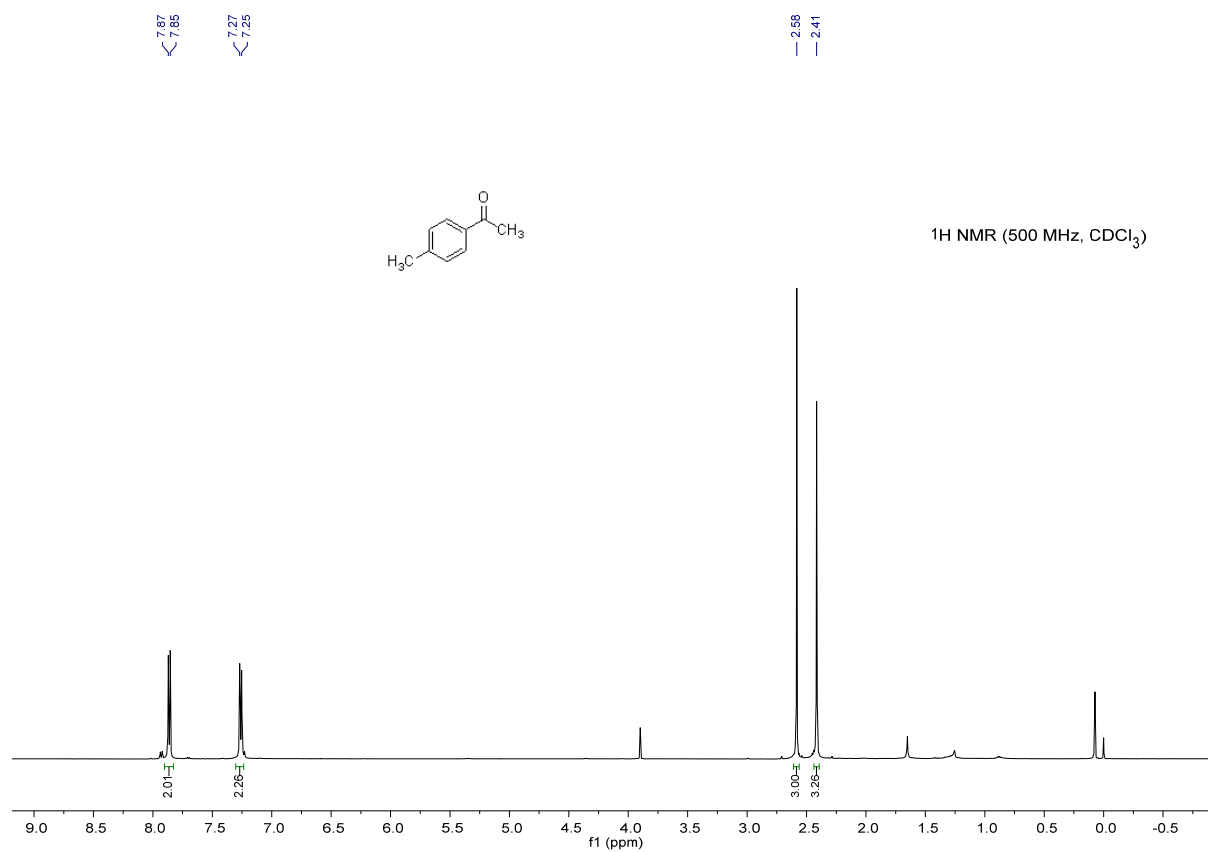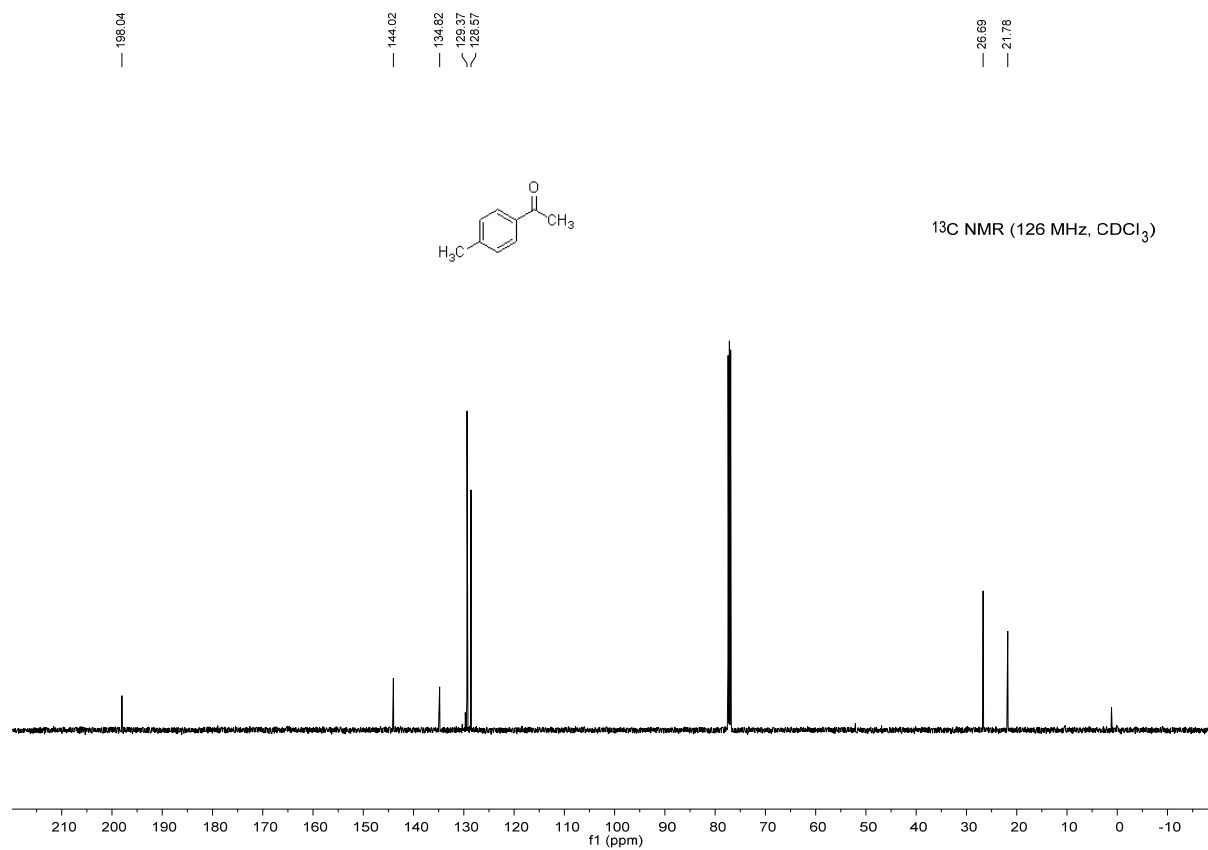

(13) 1-(*p*-tolyl)pentan-1-one (**3bb**)

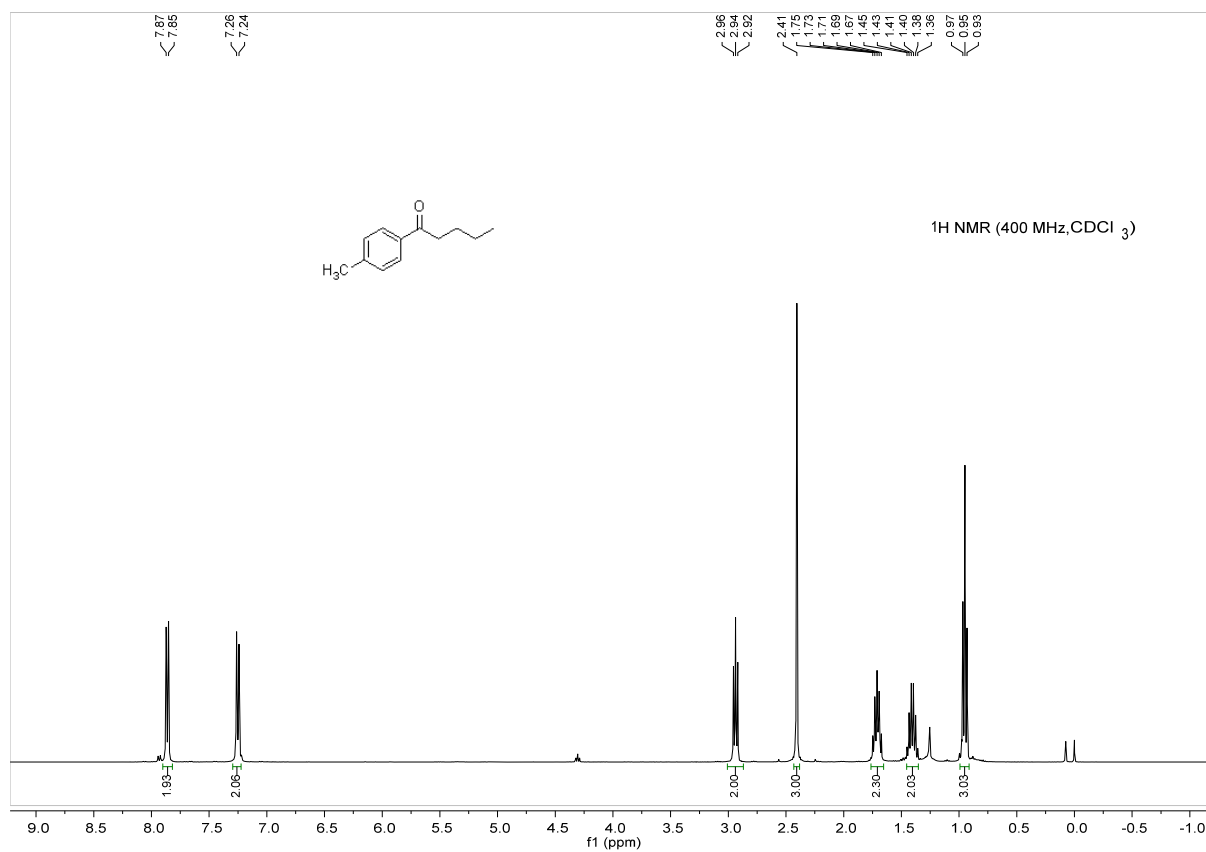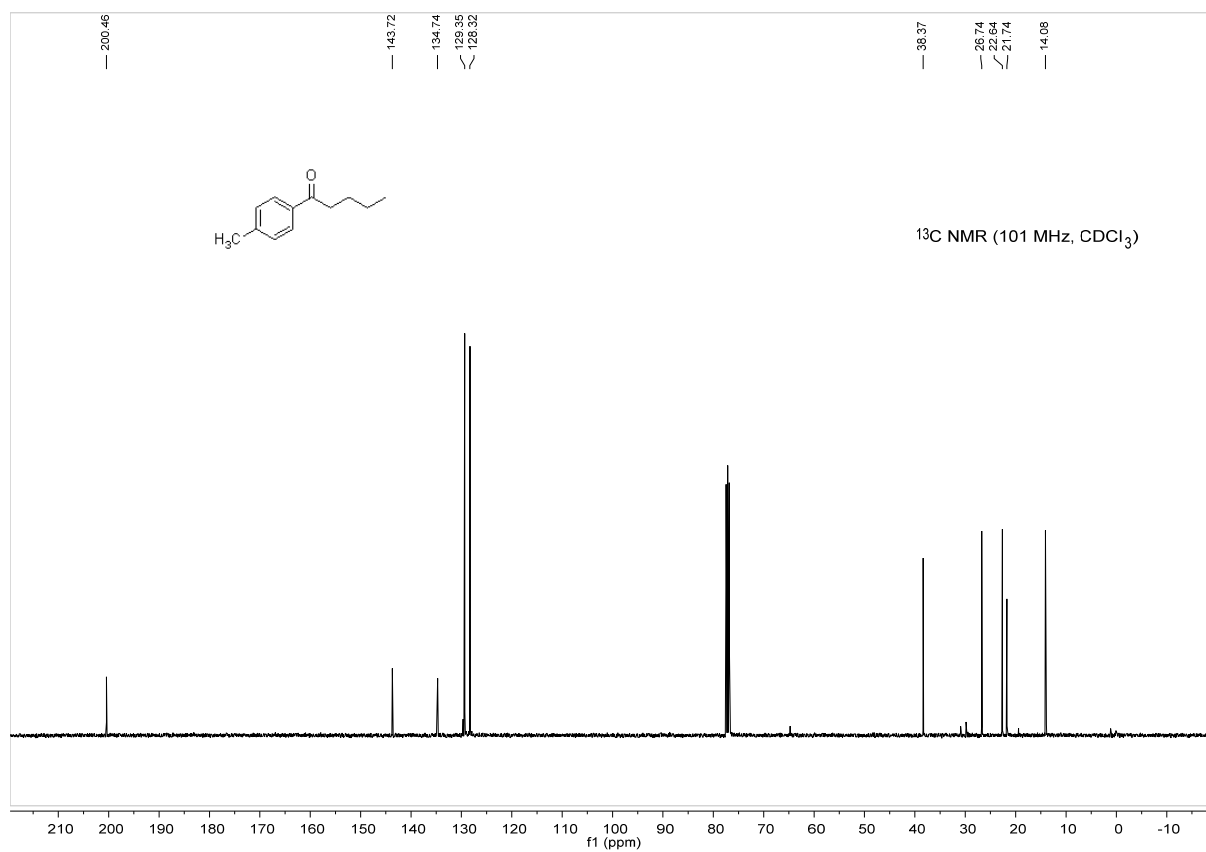

(14) 1-(*p*-tolyl)heptan-1-one (**3bc**)

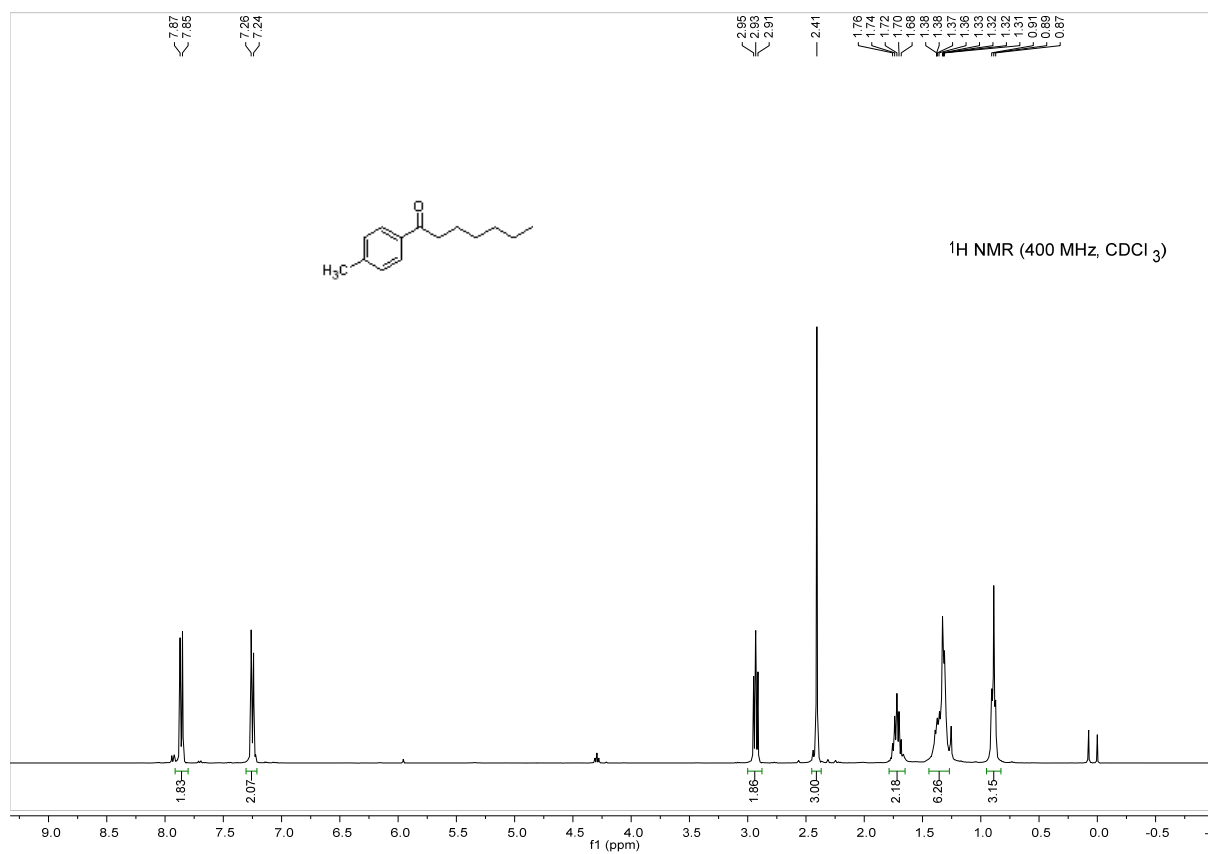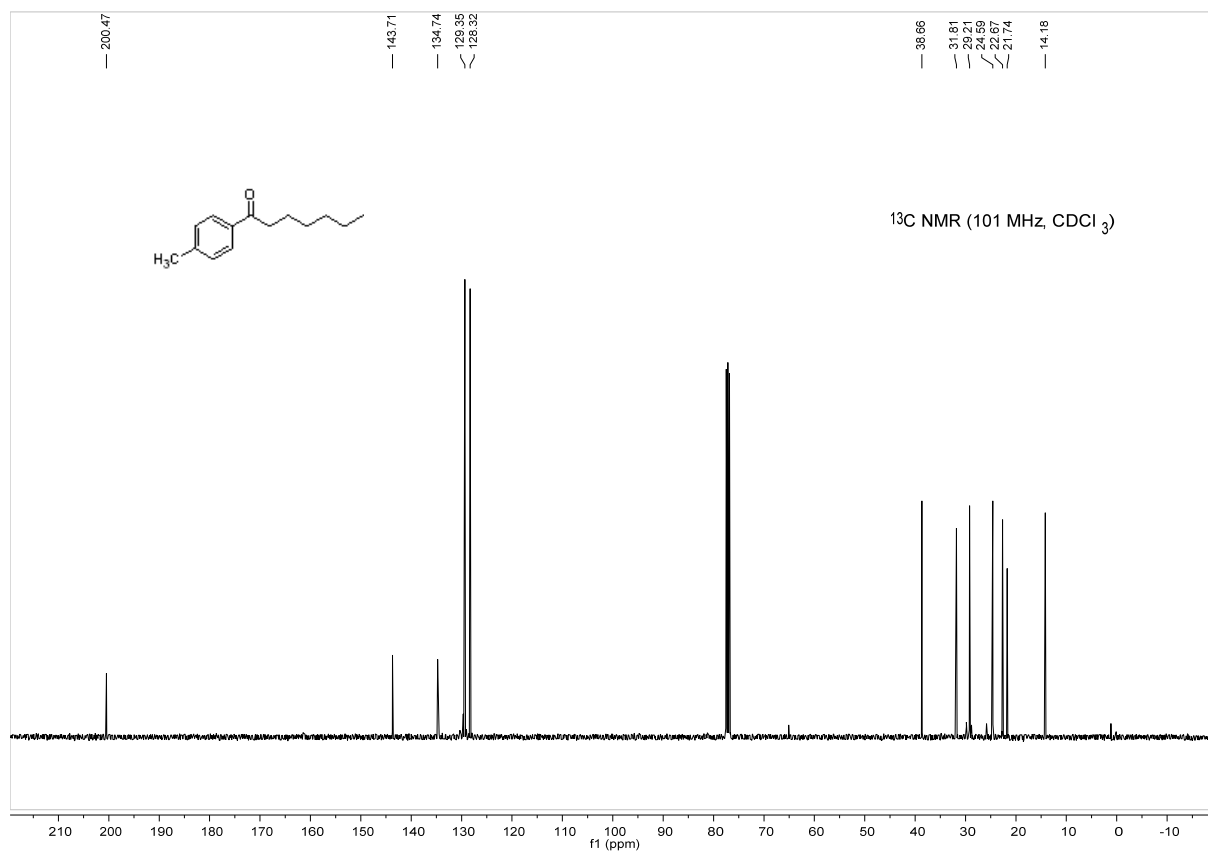



(15) 4,4-dimethyl-1-(*p*-tolyl)pentan-1-one (**3bd**)

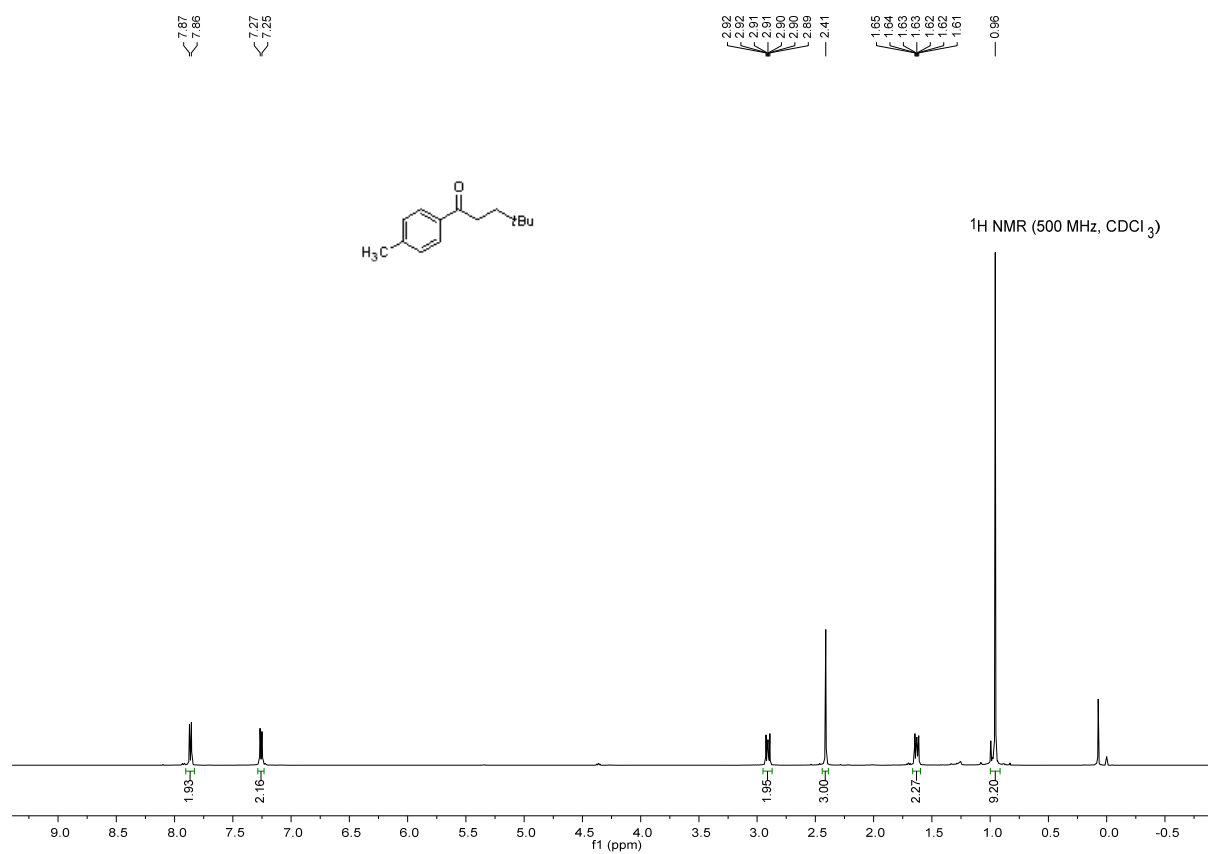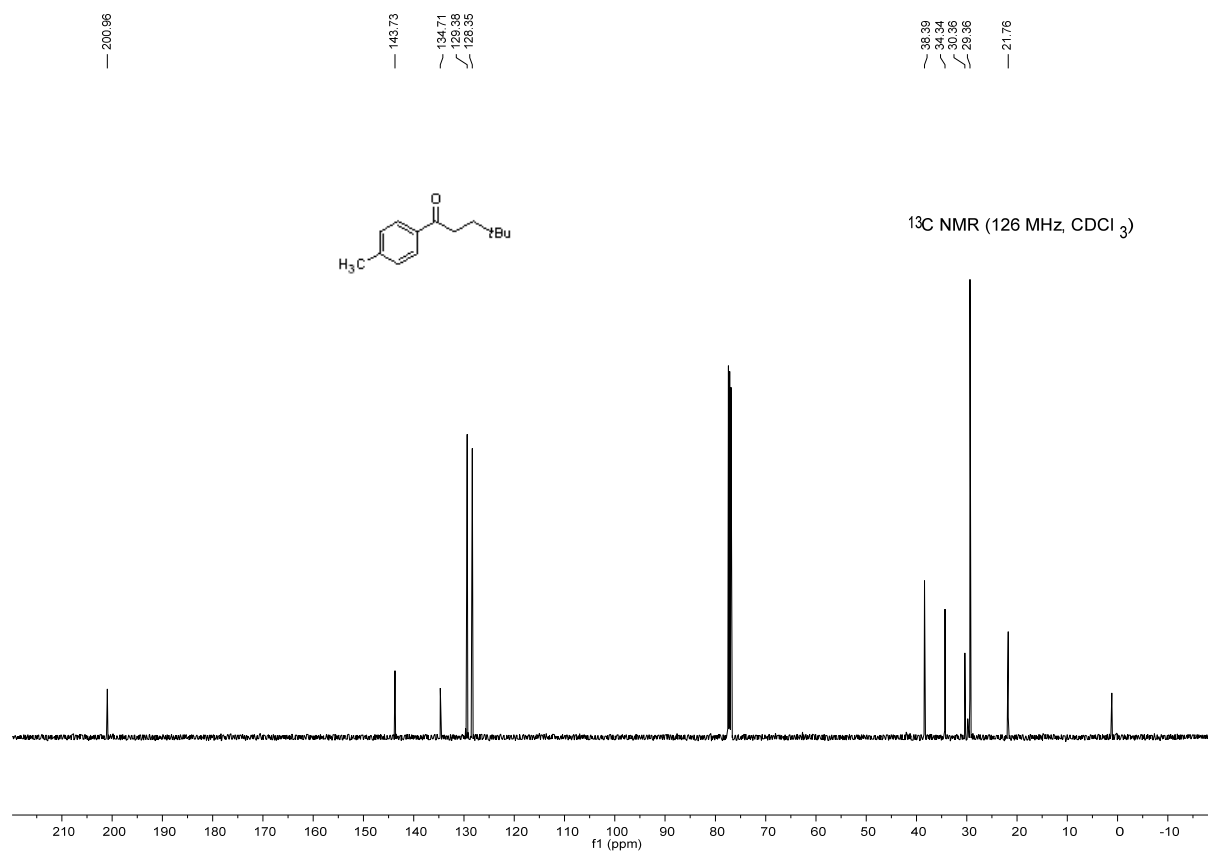

(16) 3-(1-adamantyl)-1-(*p*-tolyl)propan-1-one (**3be**)

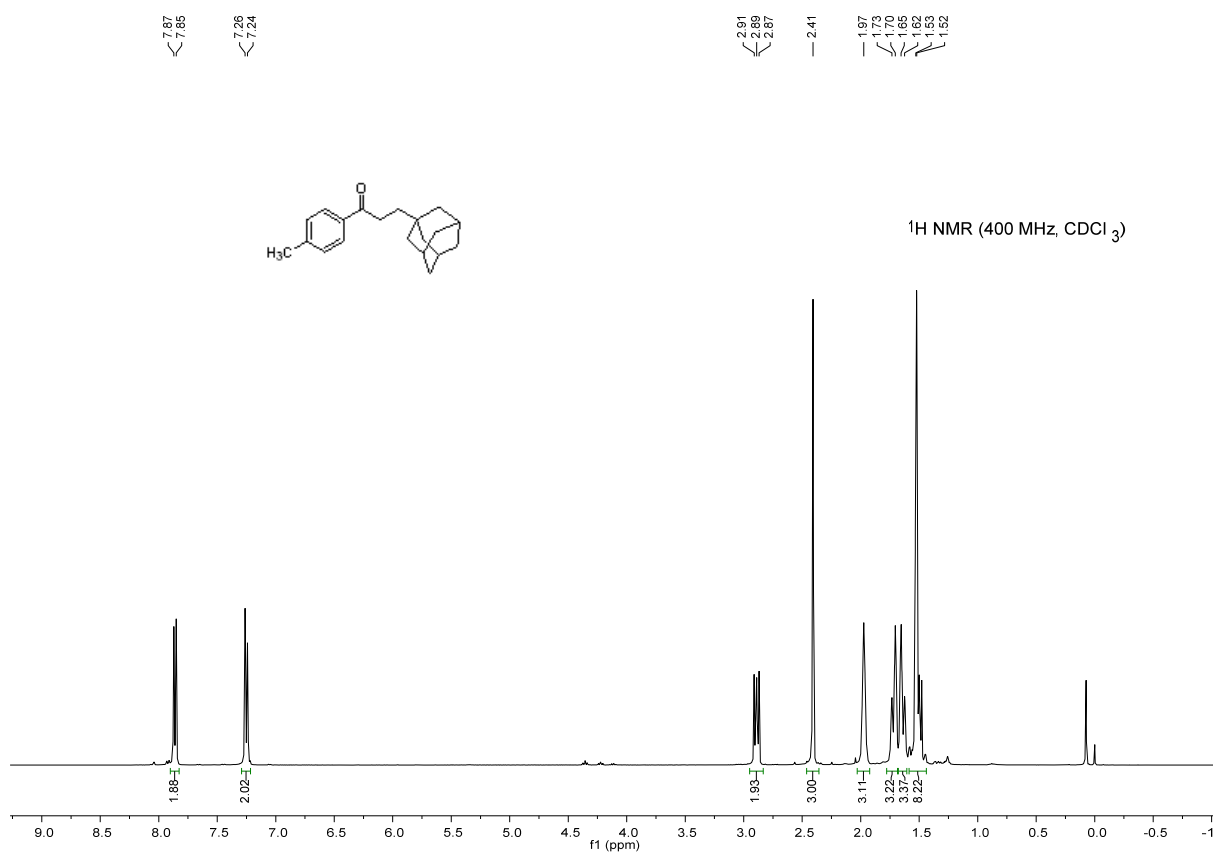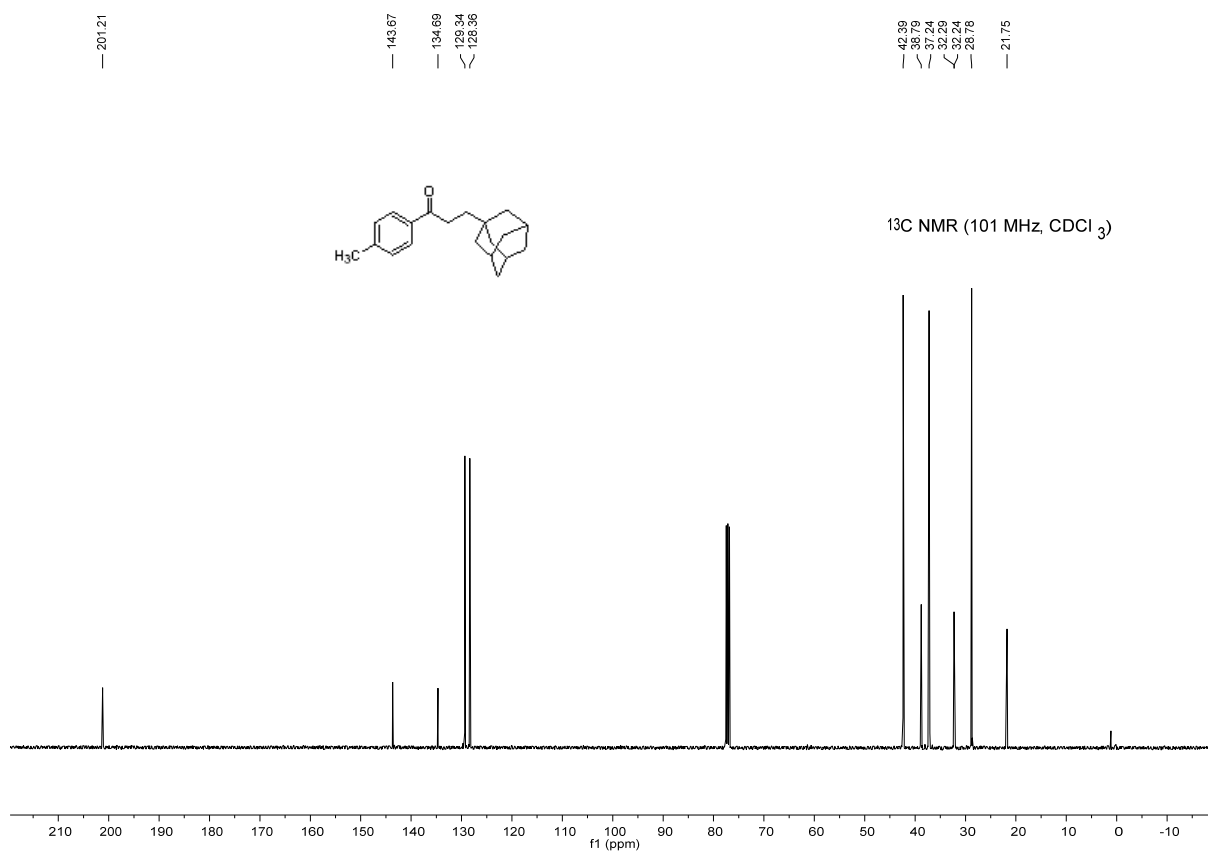

(17) 2-(cyclohex-3-en-1-yl)-1-(*p*-tolyl)ethan-1-one (**3bf**)

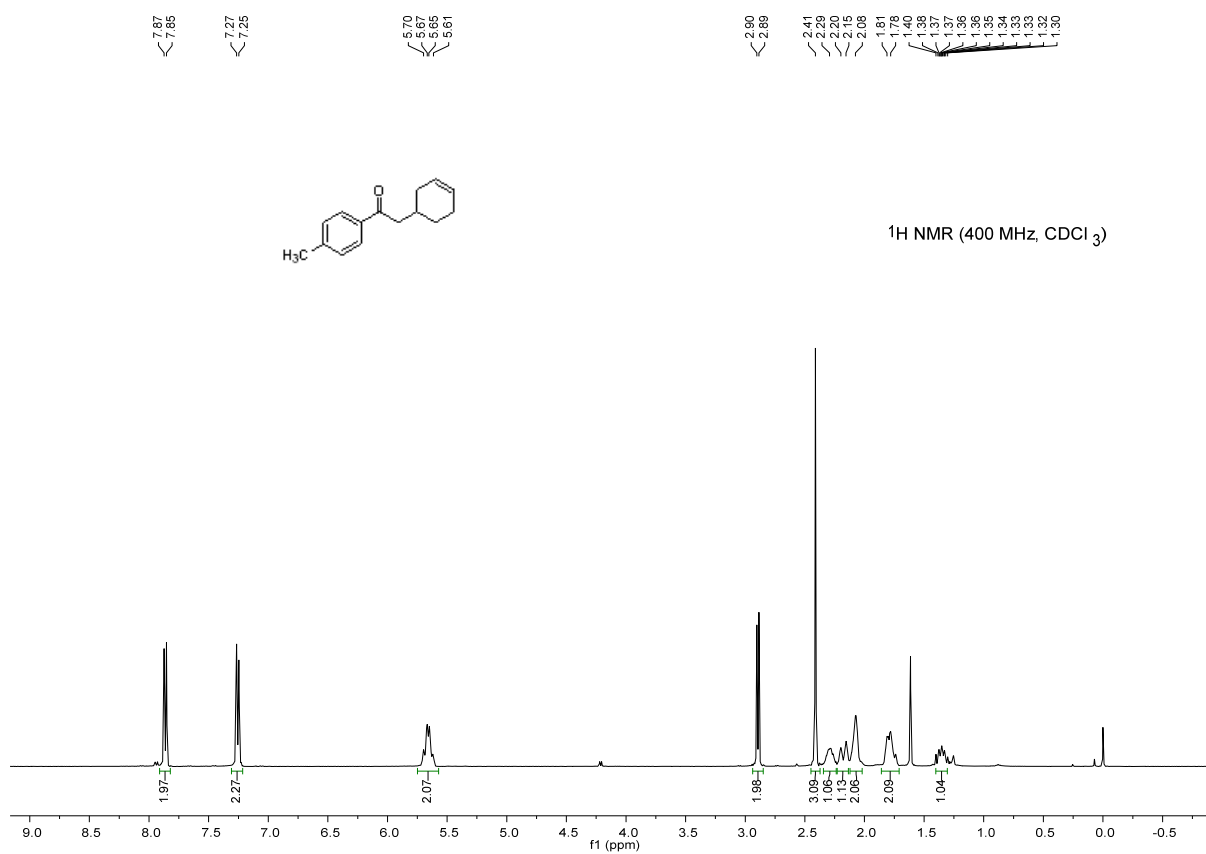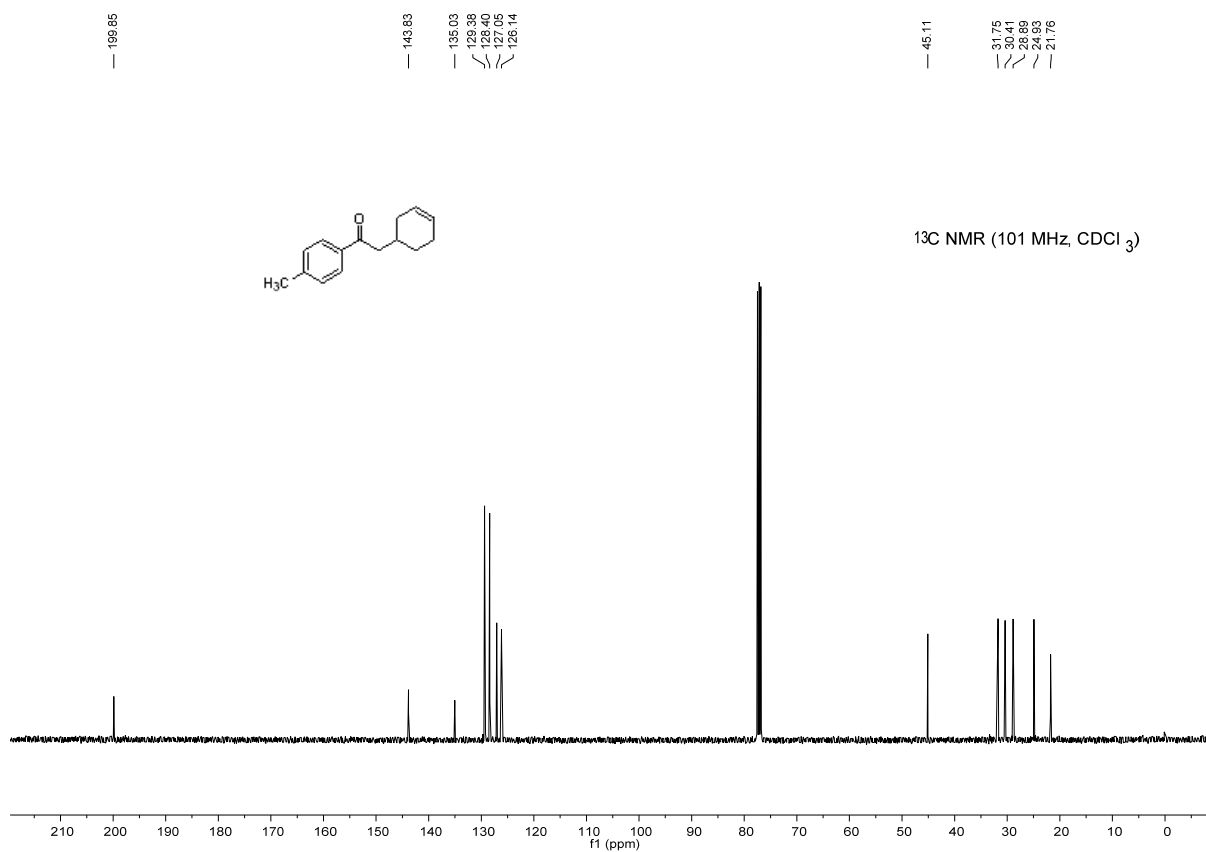

(18) 4,8-dimethyl-1-(*p*-tolyl)non-7-en-1-one (**3bg**)

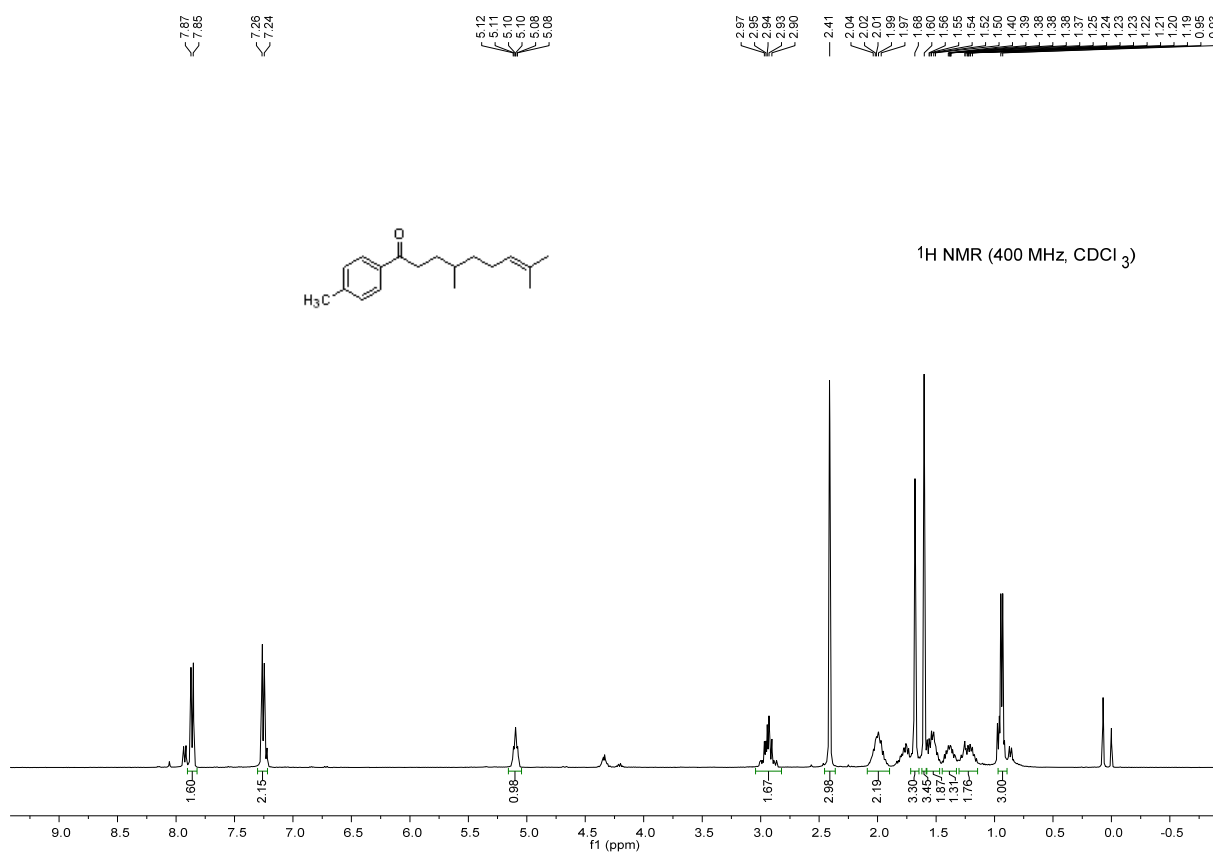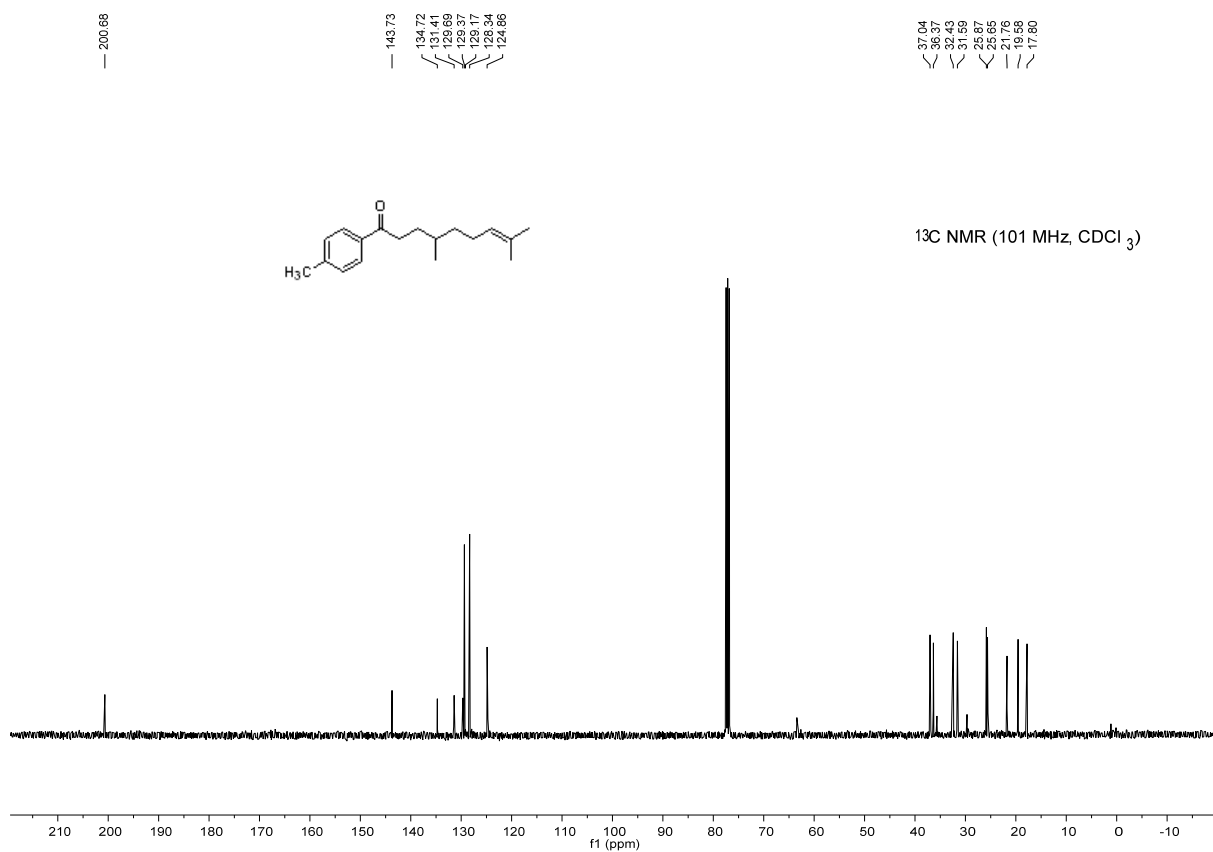

(19) 1-(*p*-tolyl)hept-4-yn-1-one (**3bh**)

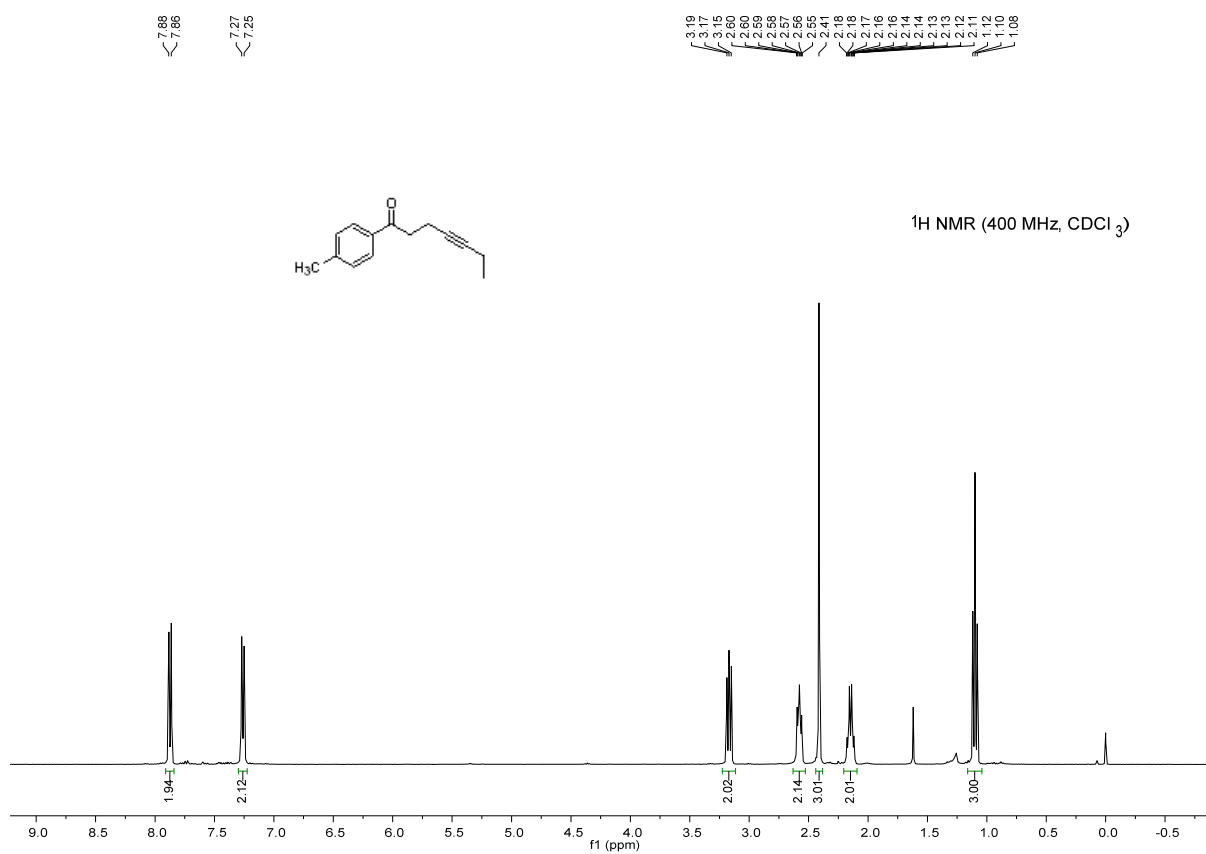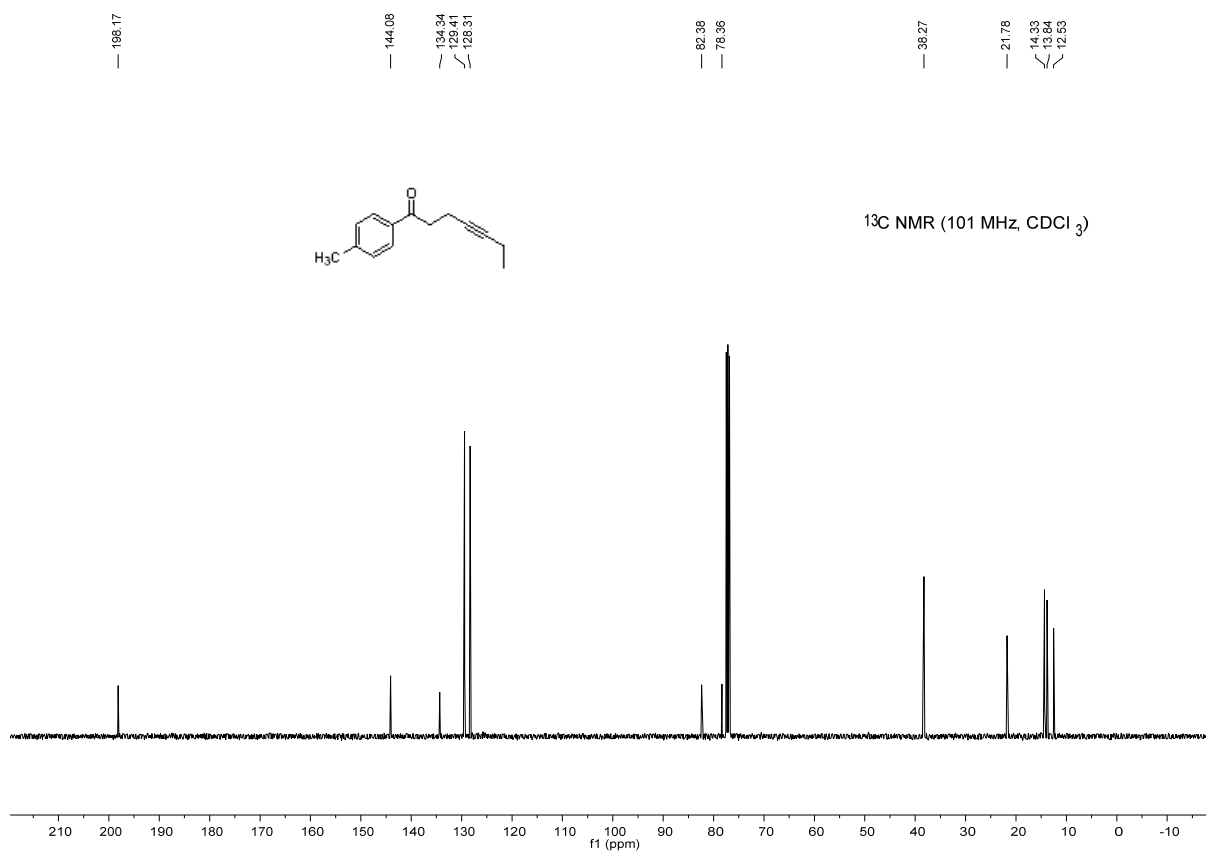

(20) 7-chloro-1-(*p*-tolyl)heptan-1-one (**3bi**)

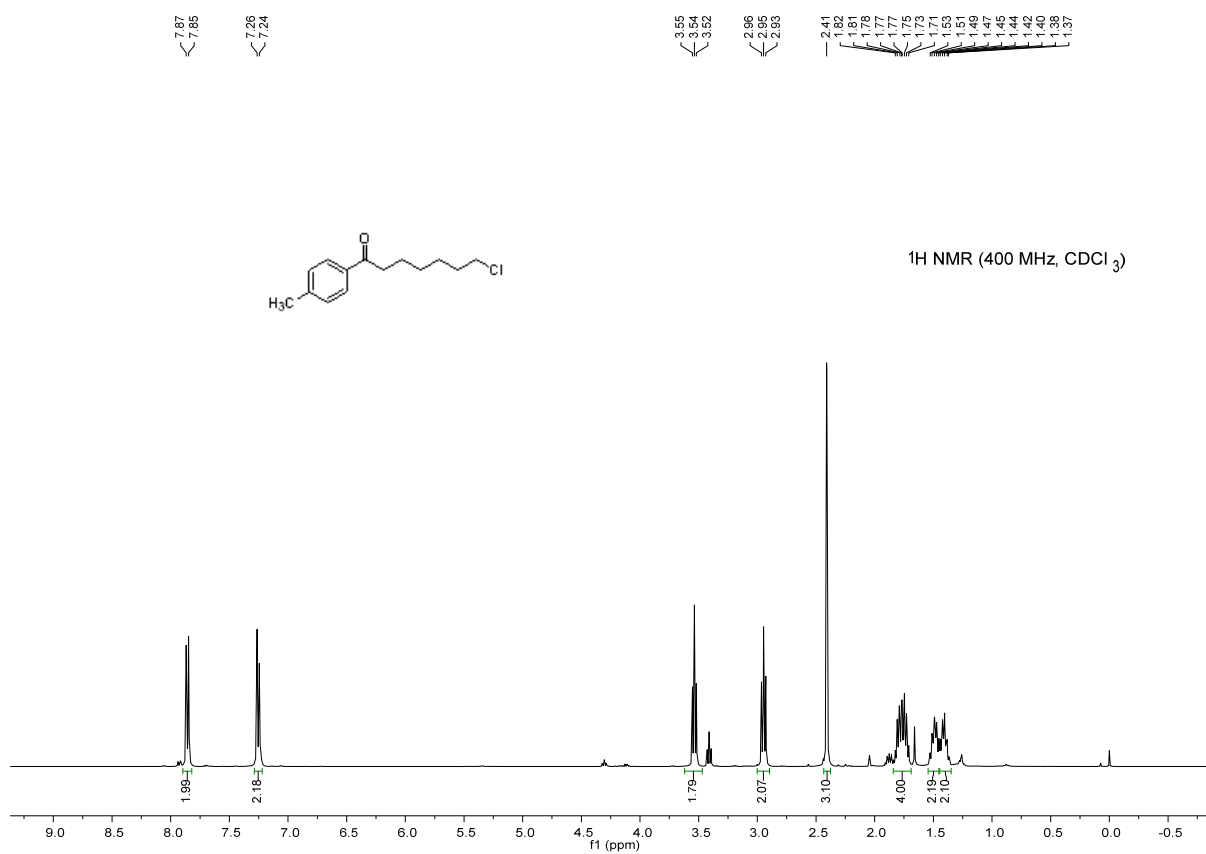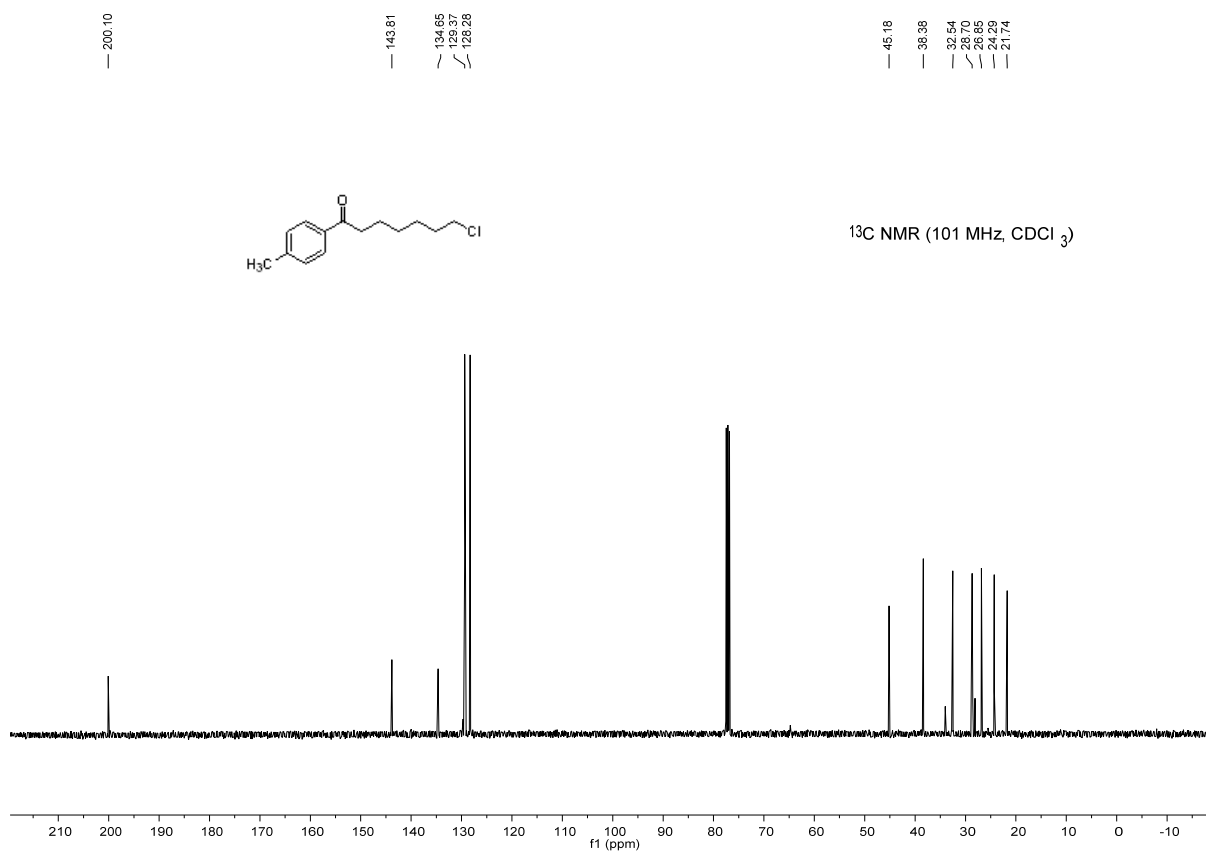

(21) methyl 8-oxo-8-(*p*-tolyl)octanoate (**3bj**)

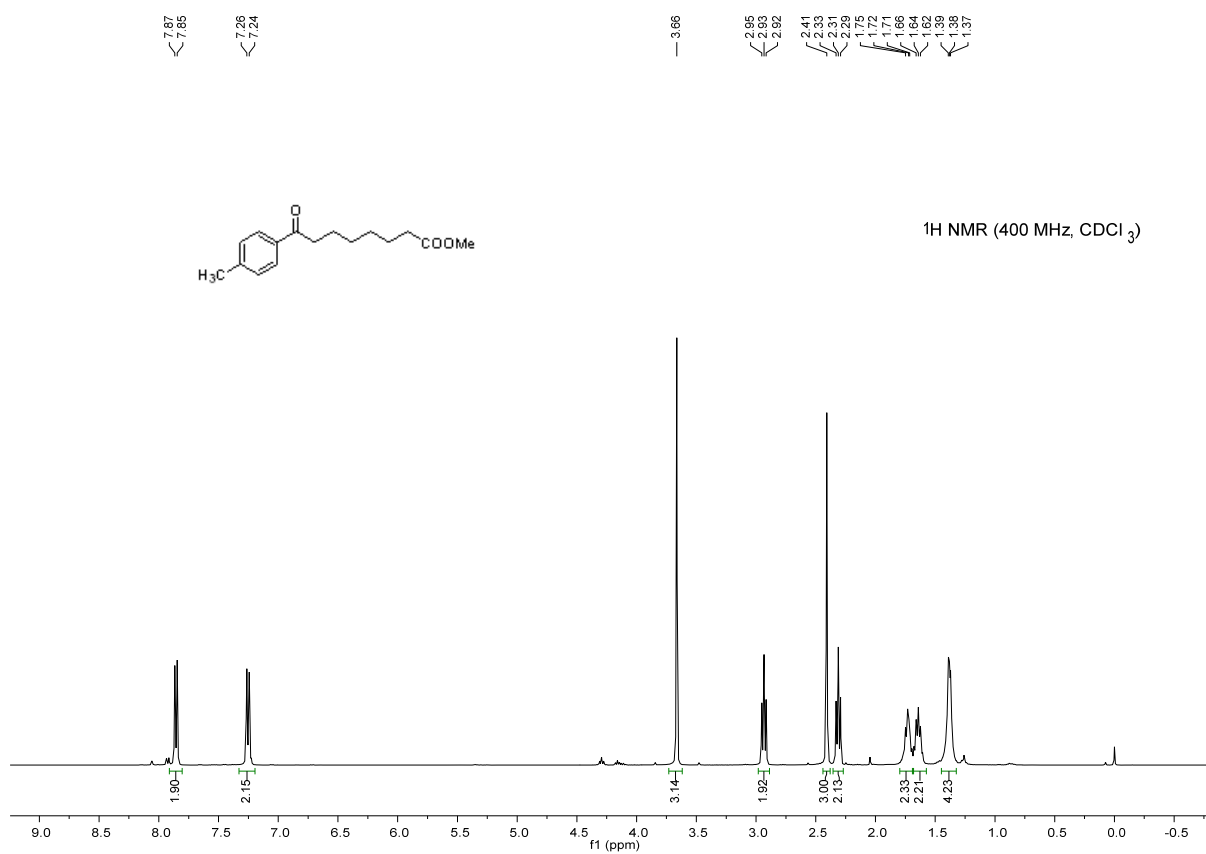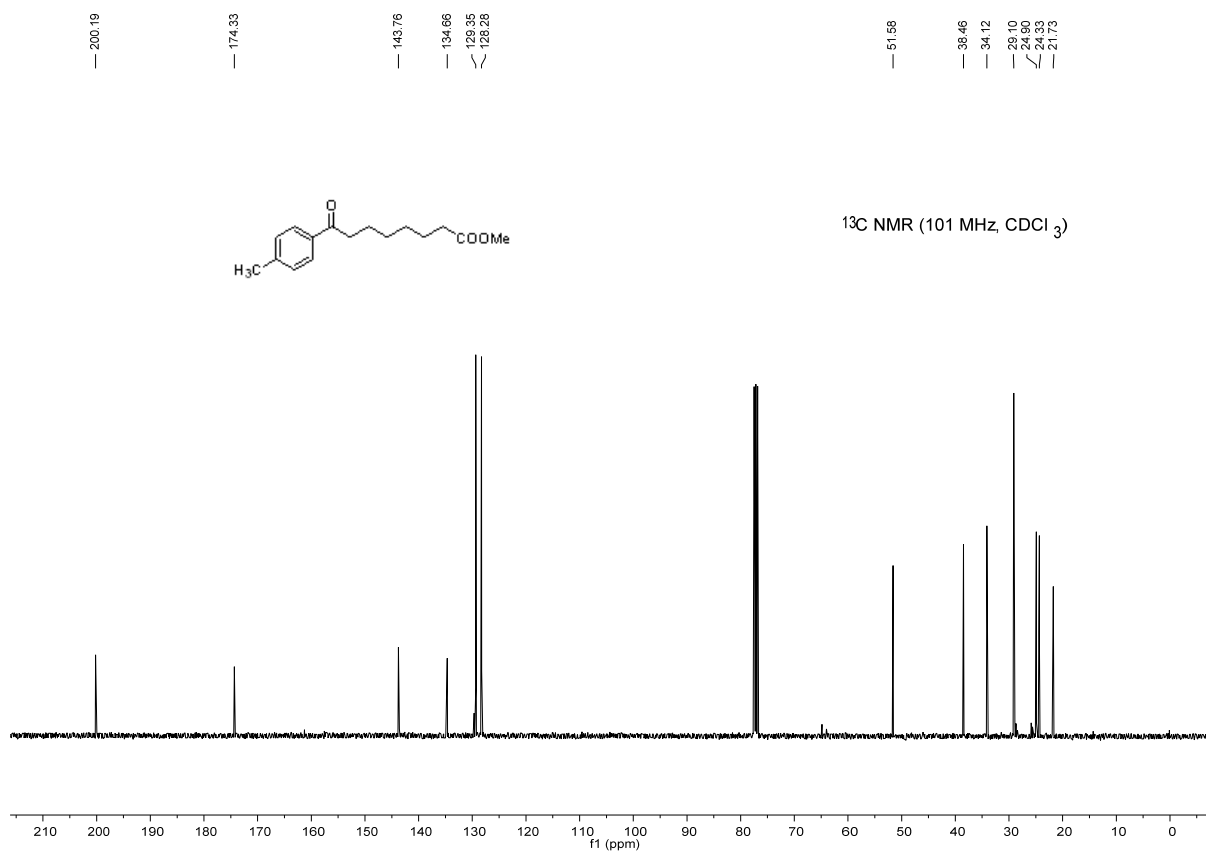

(22) 7-oxo-7-(*p*-tolyl)heptyl 4-methylbenzoate (**3bk**)

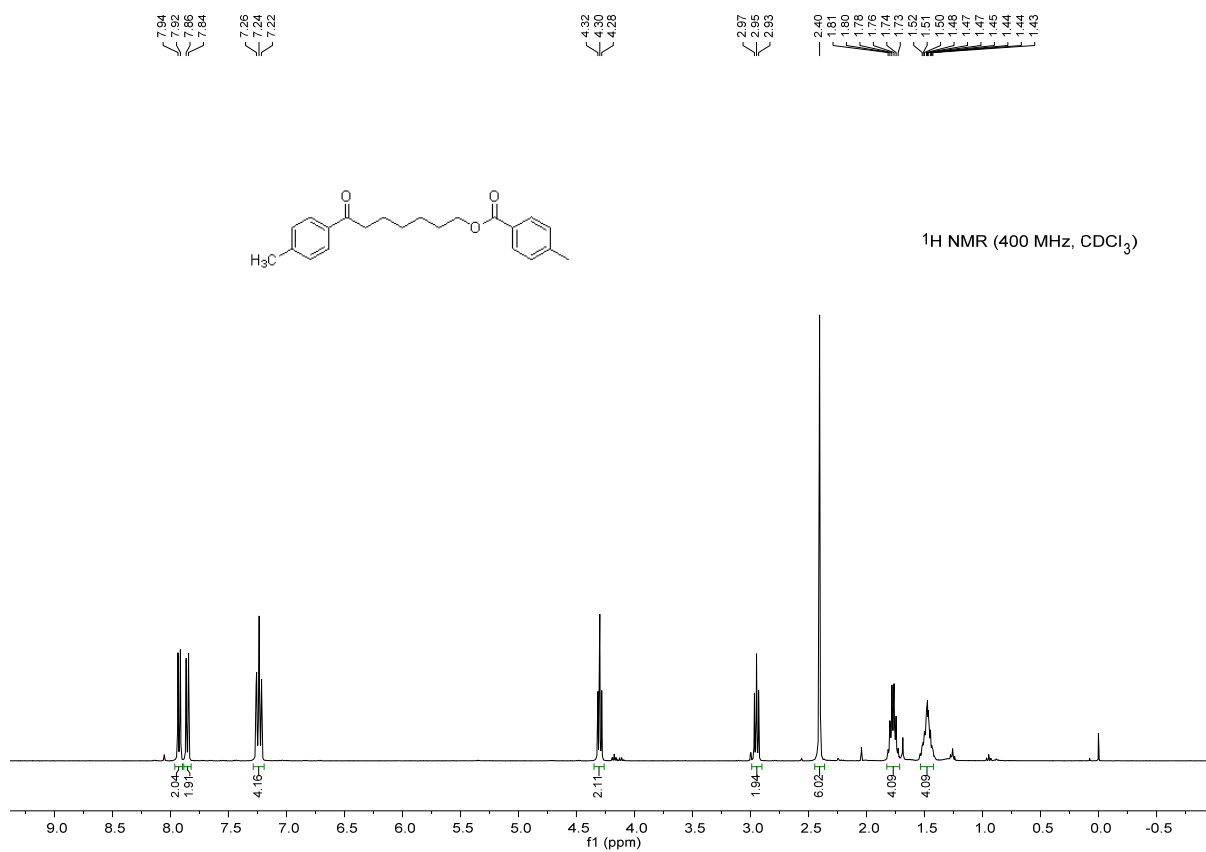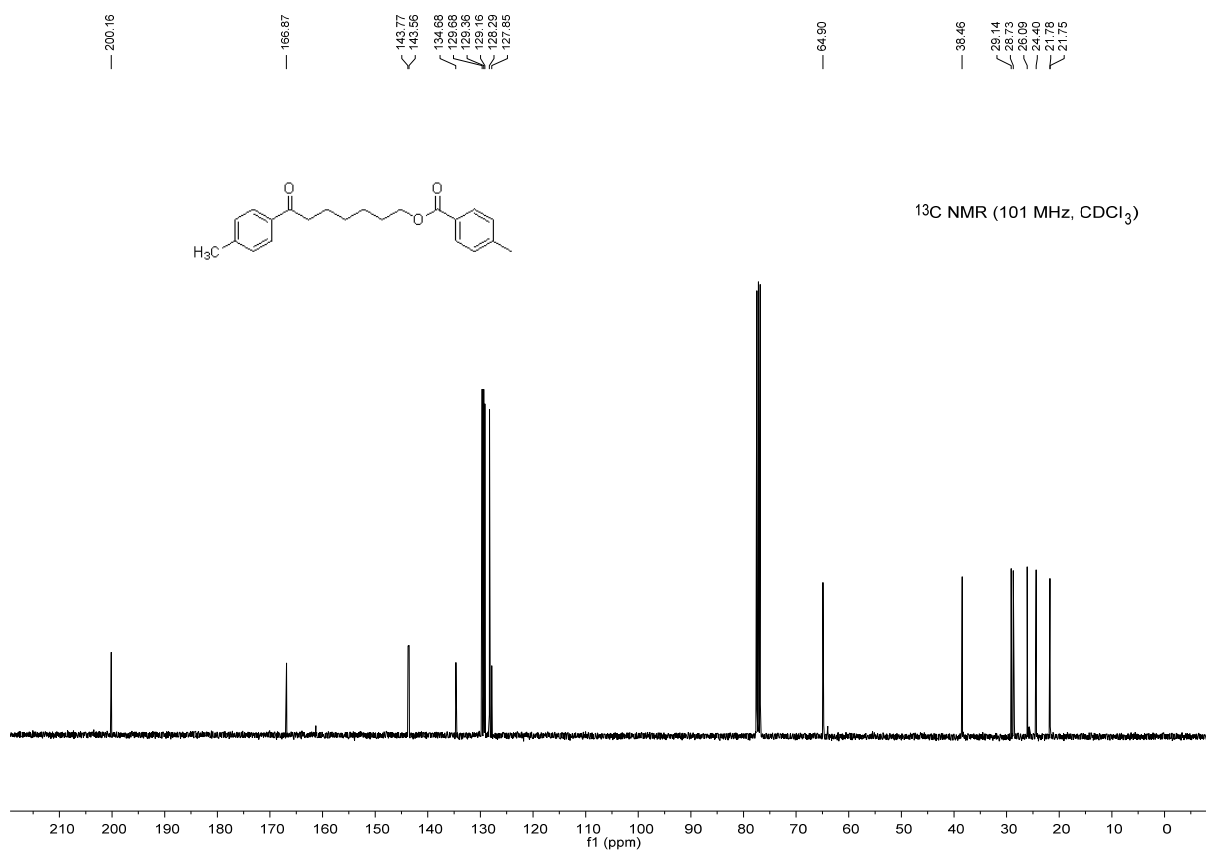



(23) 3-(4-fluorophenyl)-1-(*p*-tolyl)propan-1-one (**3bl**)

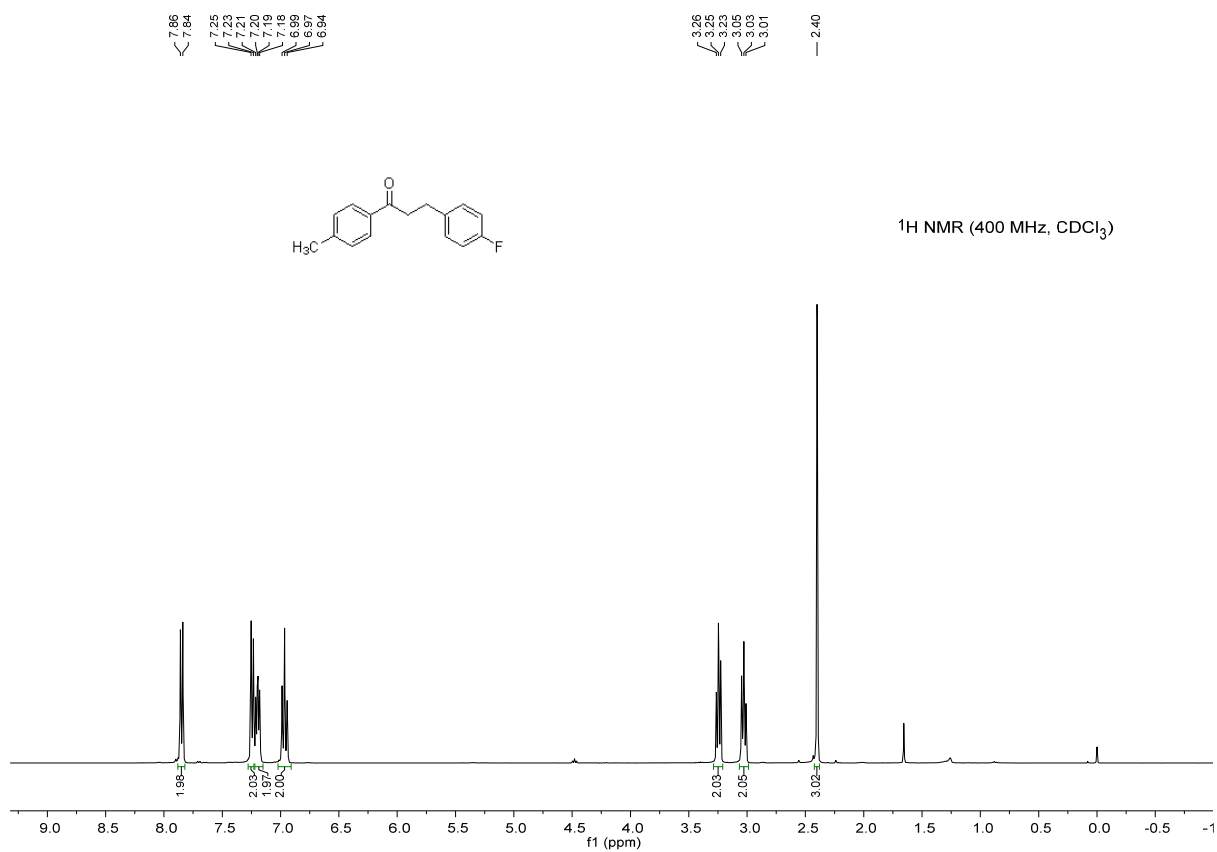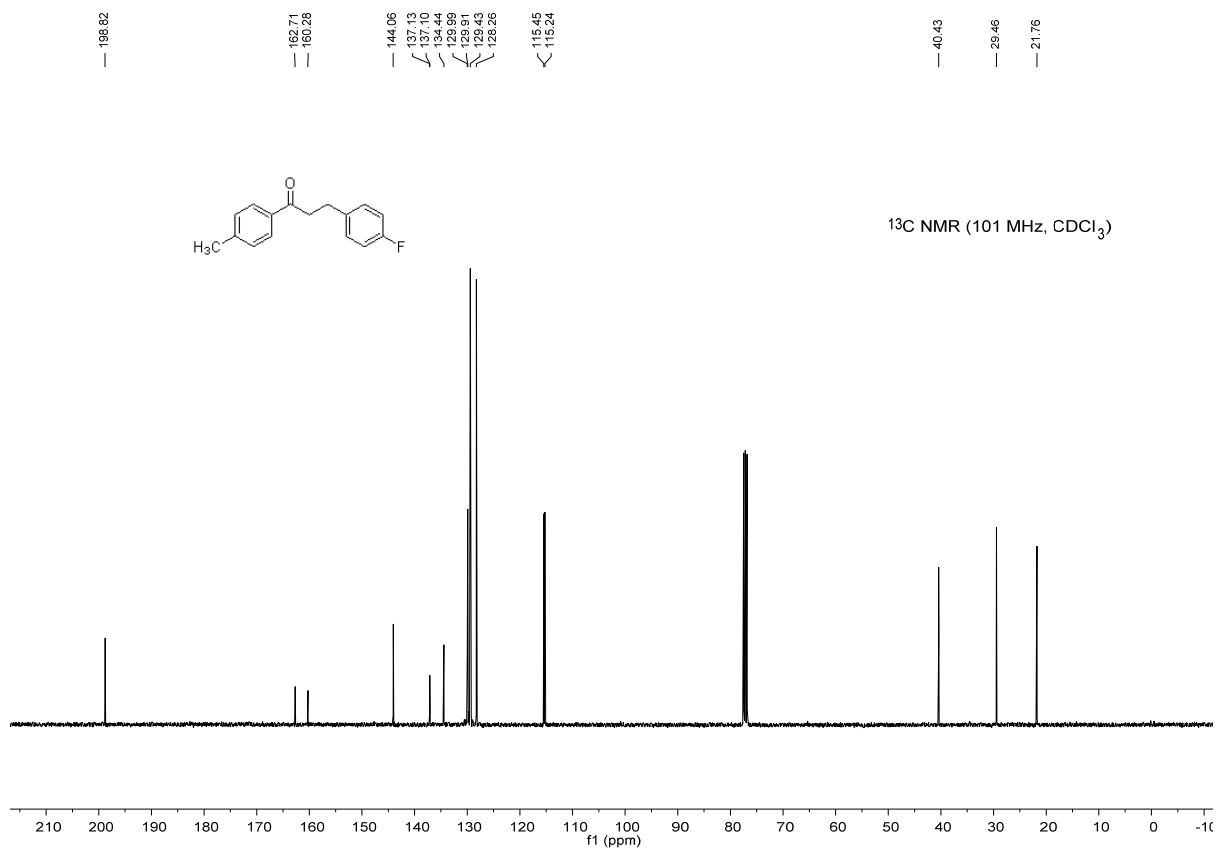

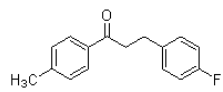

<sup>19</sup>F NMR (376 MHz, CDCl<sub>3</sub>)

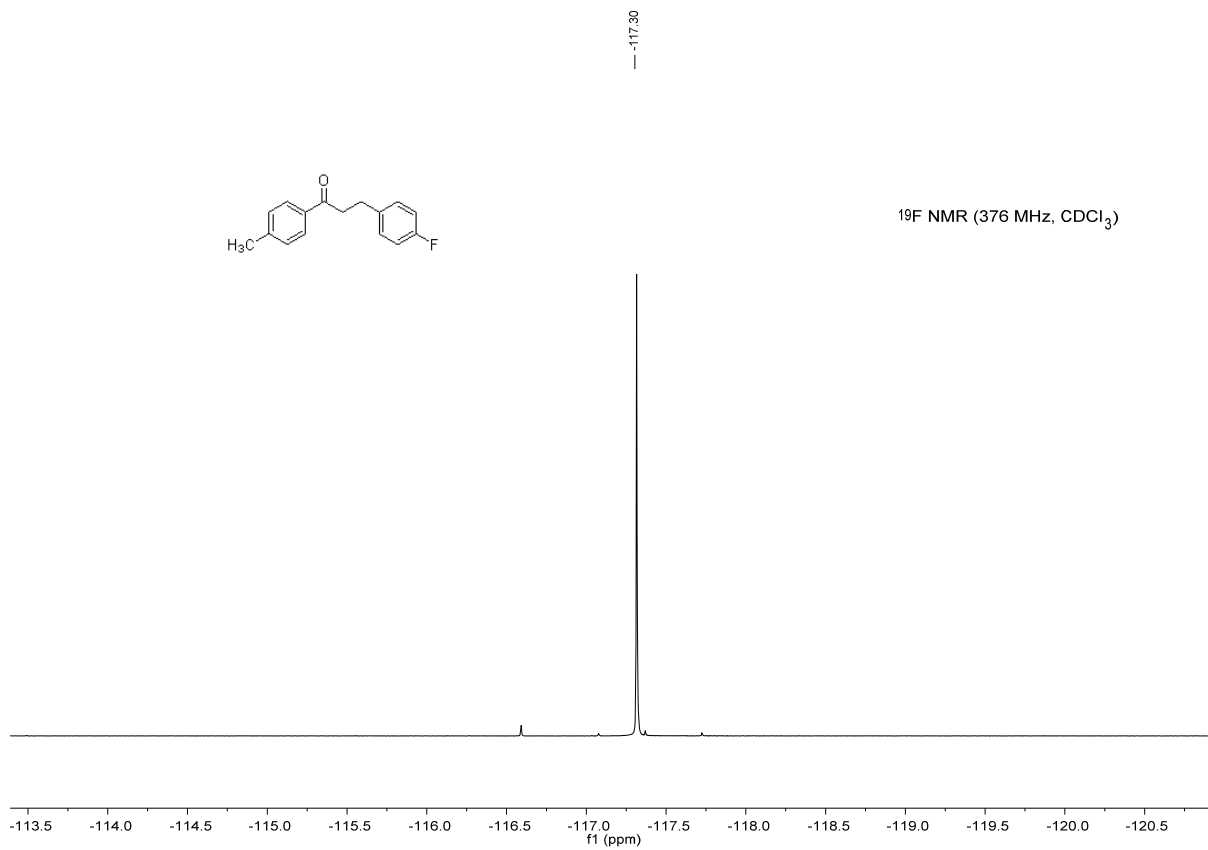

(24) 1-(*p*-tolyl)-3-(4-(trifluoromethyl)phenyl)propan-1-one (**3bm**)

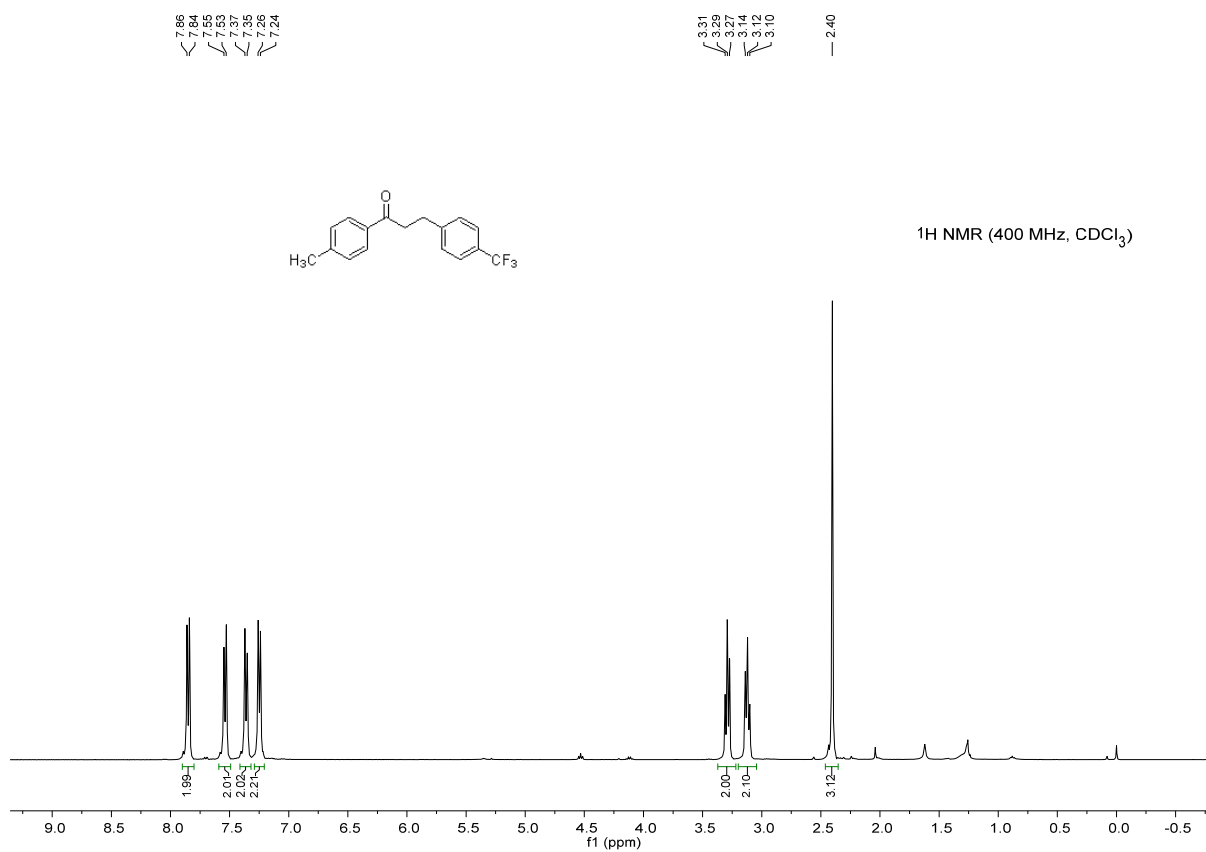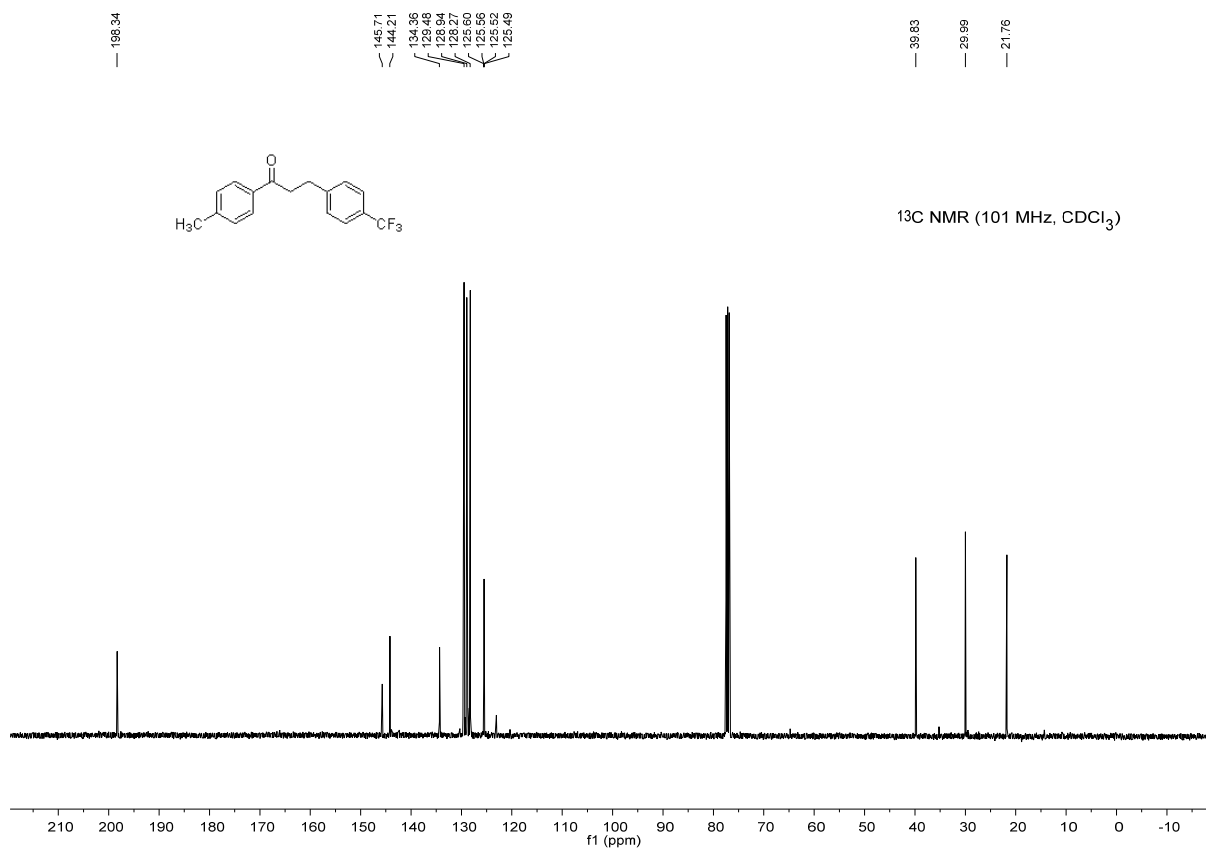

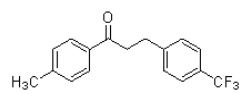

$^{19}\text{F}$  NMR (376 MHz,  $\text{CDCl}_3$ )

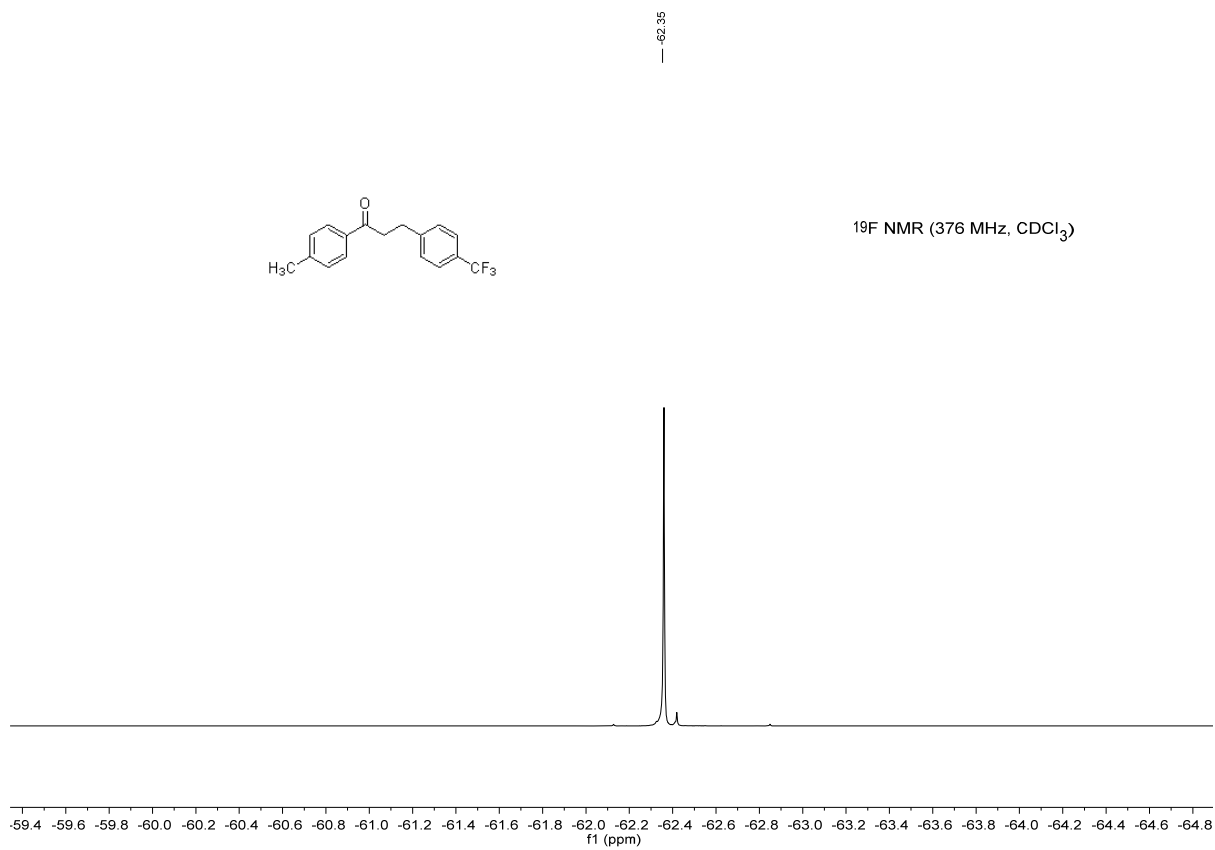

(25) 4-(4-bromophenyl)-1-(*p*-tolyl)butan-1-one (**3bn**)

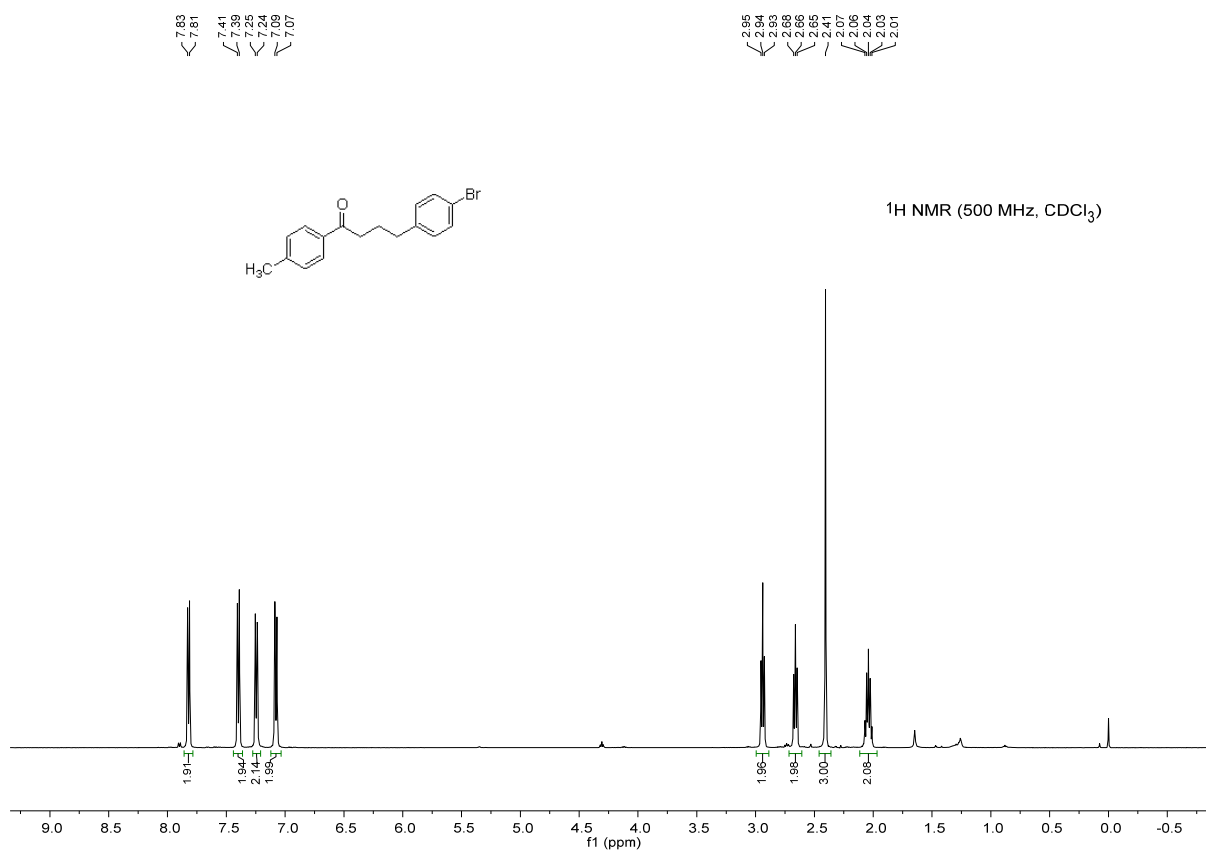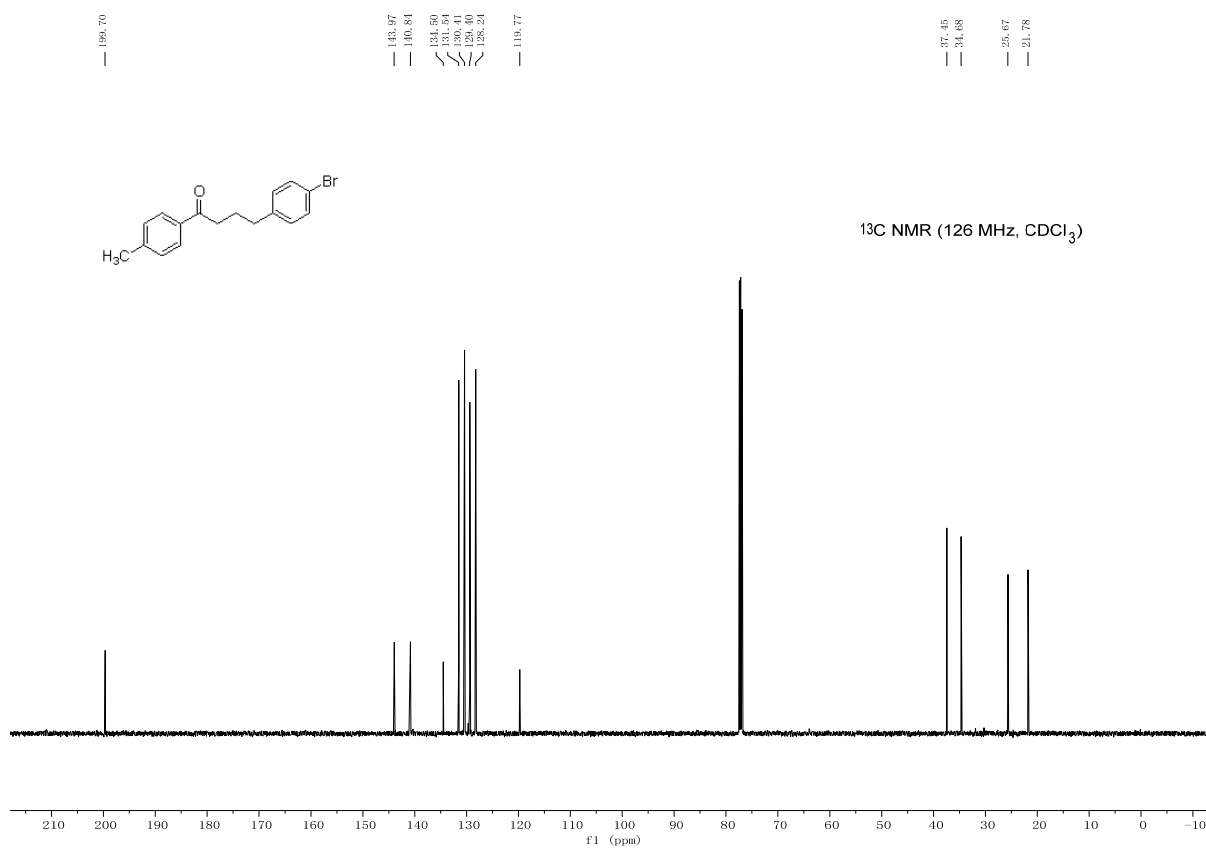

(26) 5-(4-methoxyphenyl)-1-(*p*-tolyl)pentan-1-one (**3bo**)

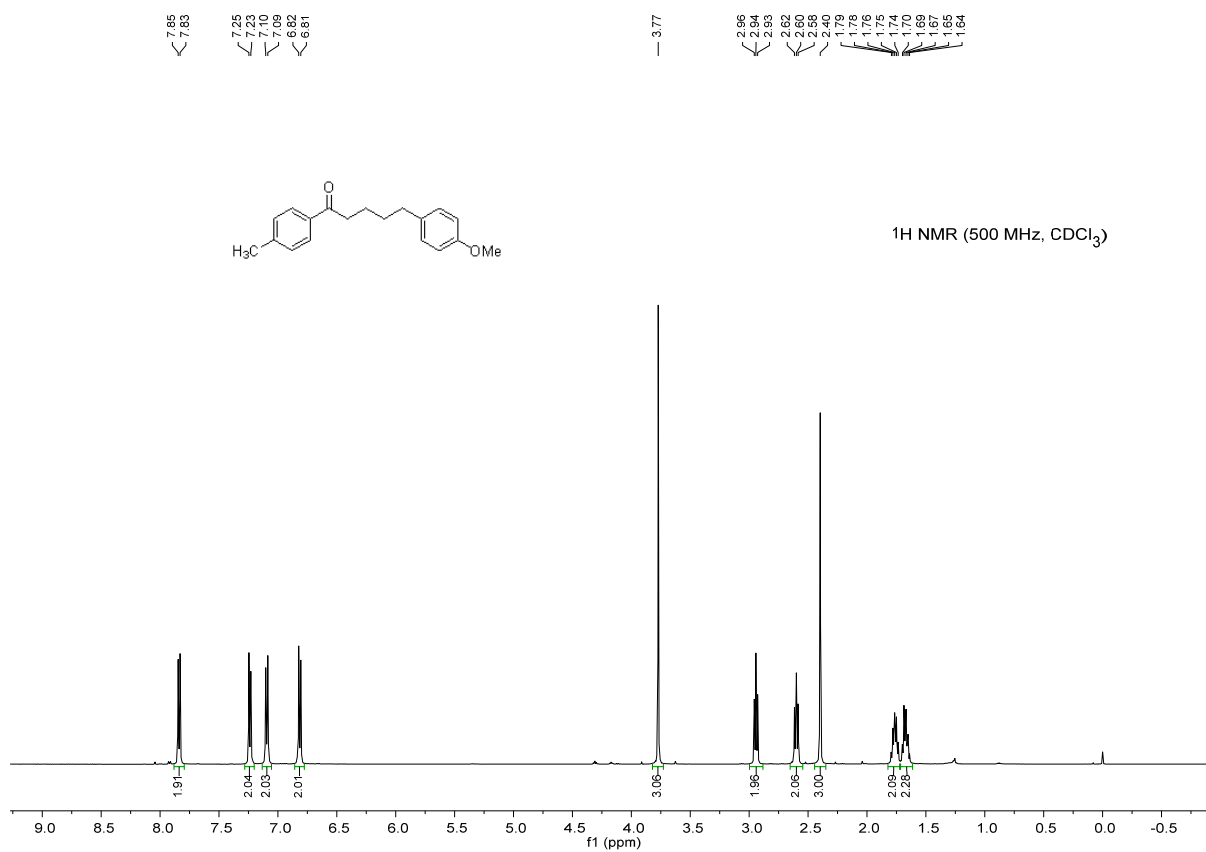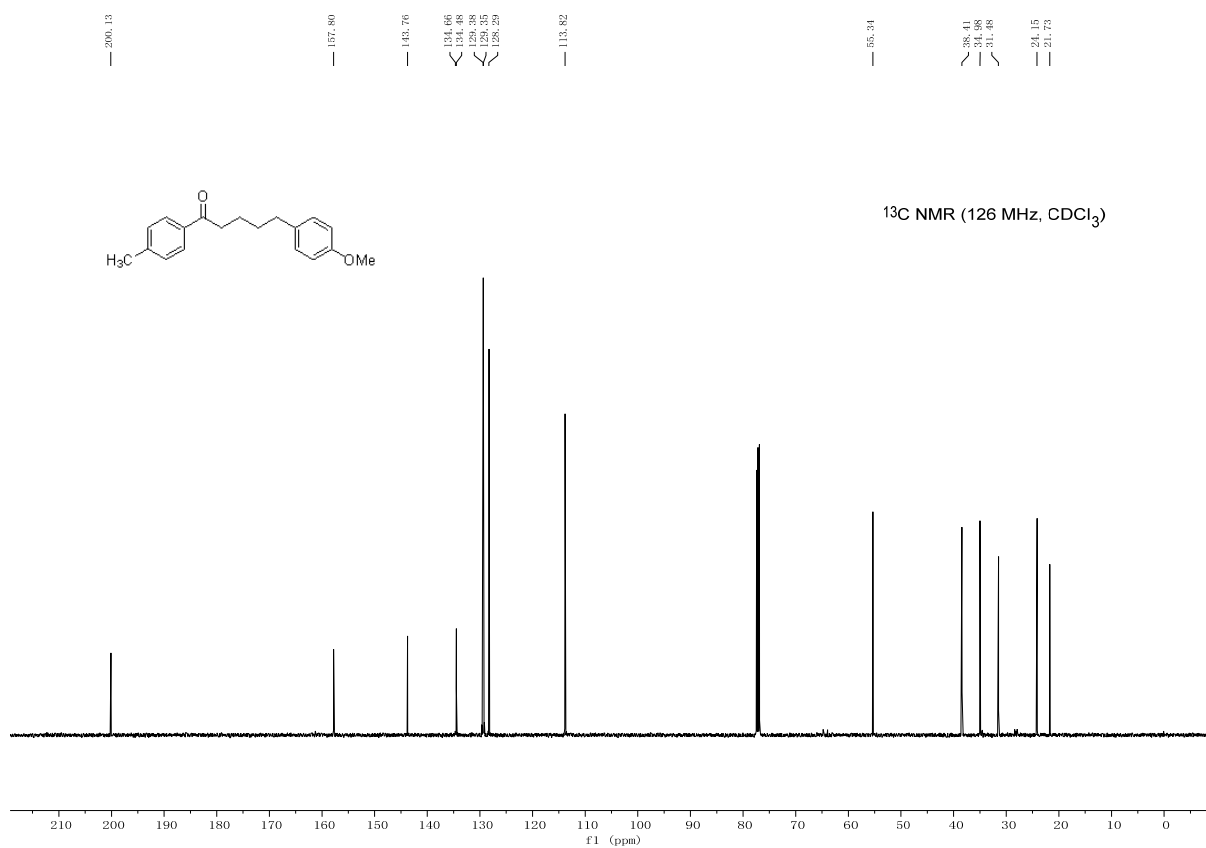

(27) 2-methyl-1-(*p*-tolyl)heptan-1-one (**3bp**)

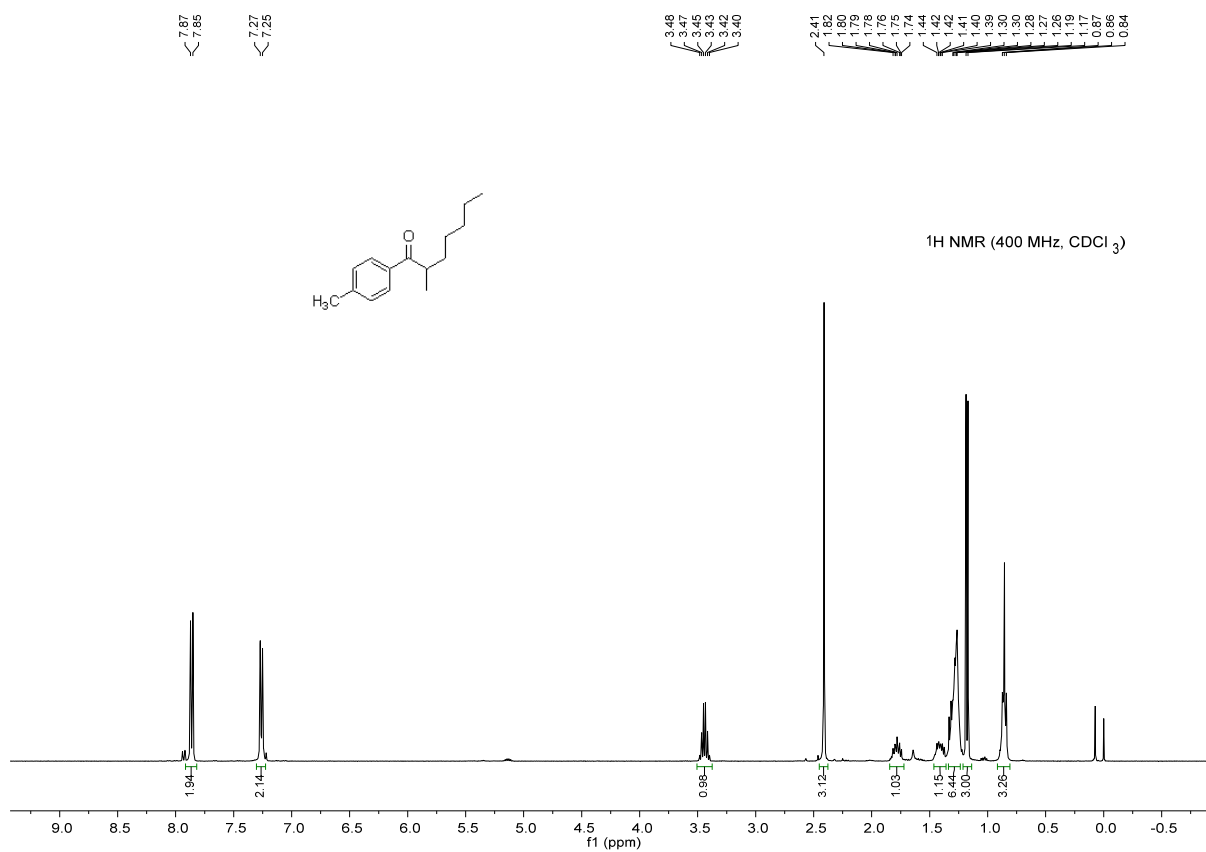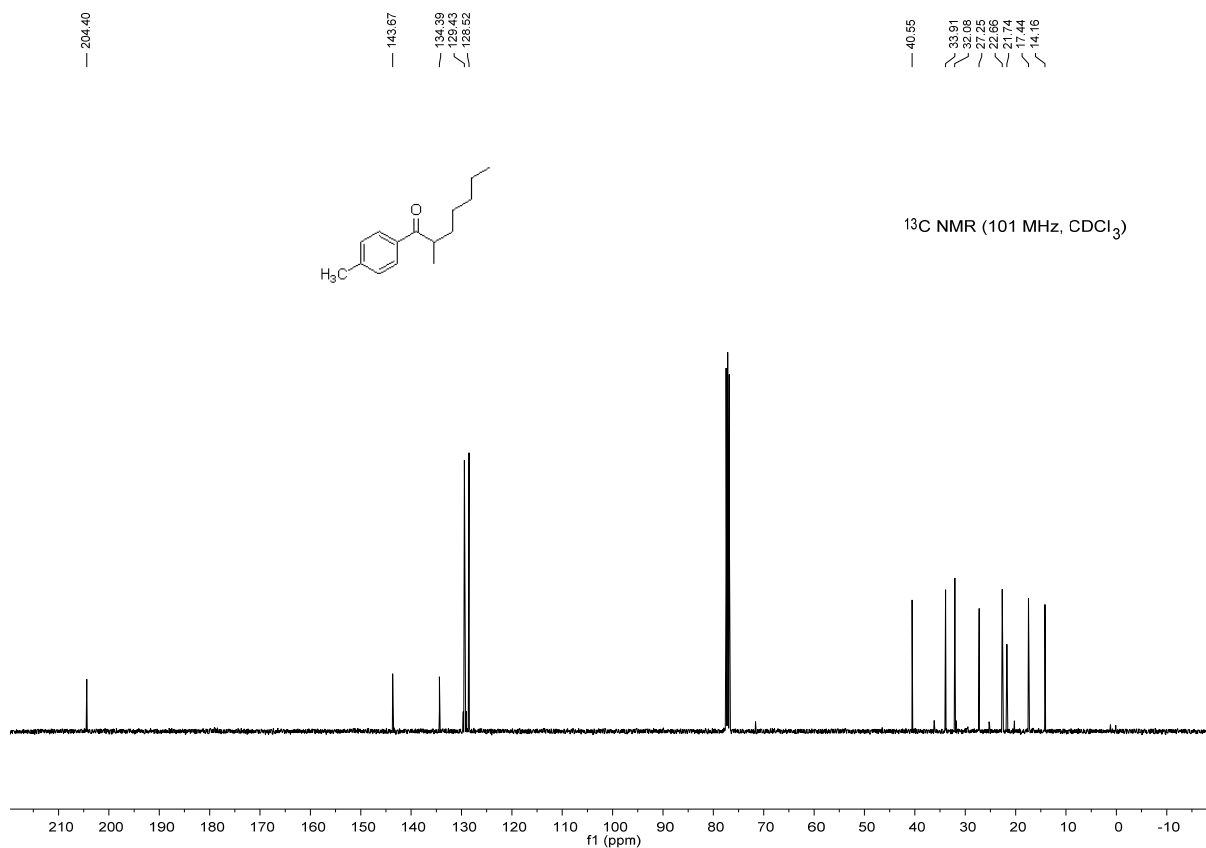

(28) 2-propyl-1-(*p*-tolyl)pentan-1-one (**3bq**)

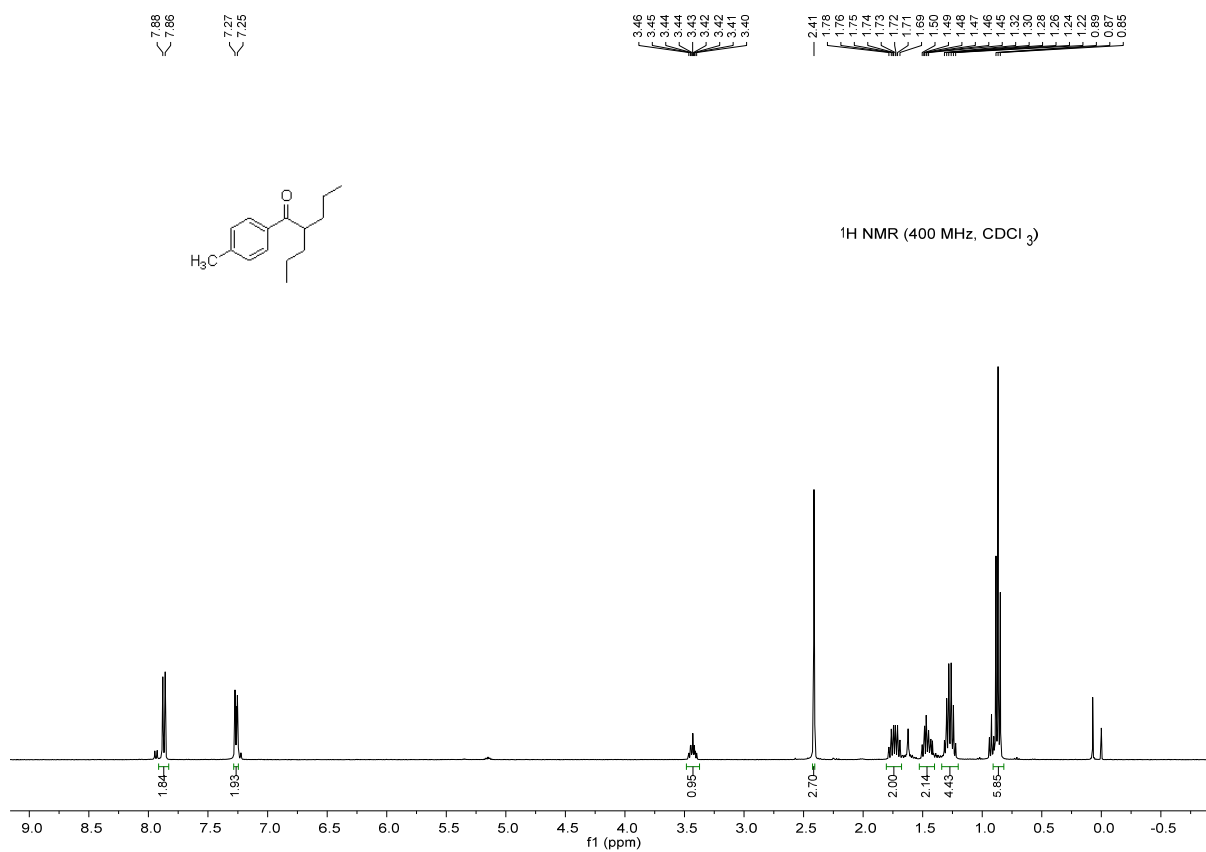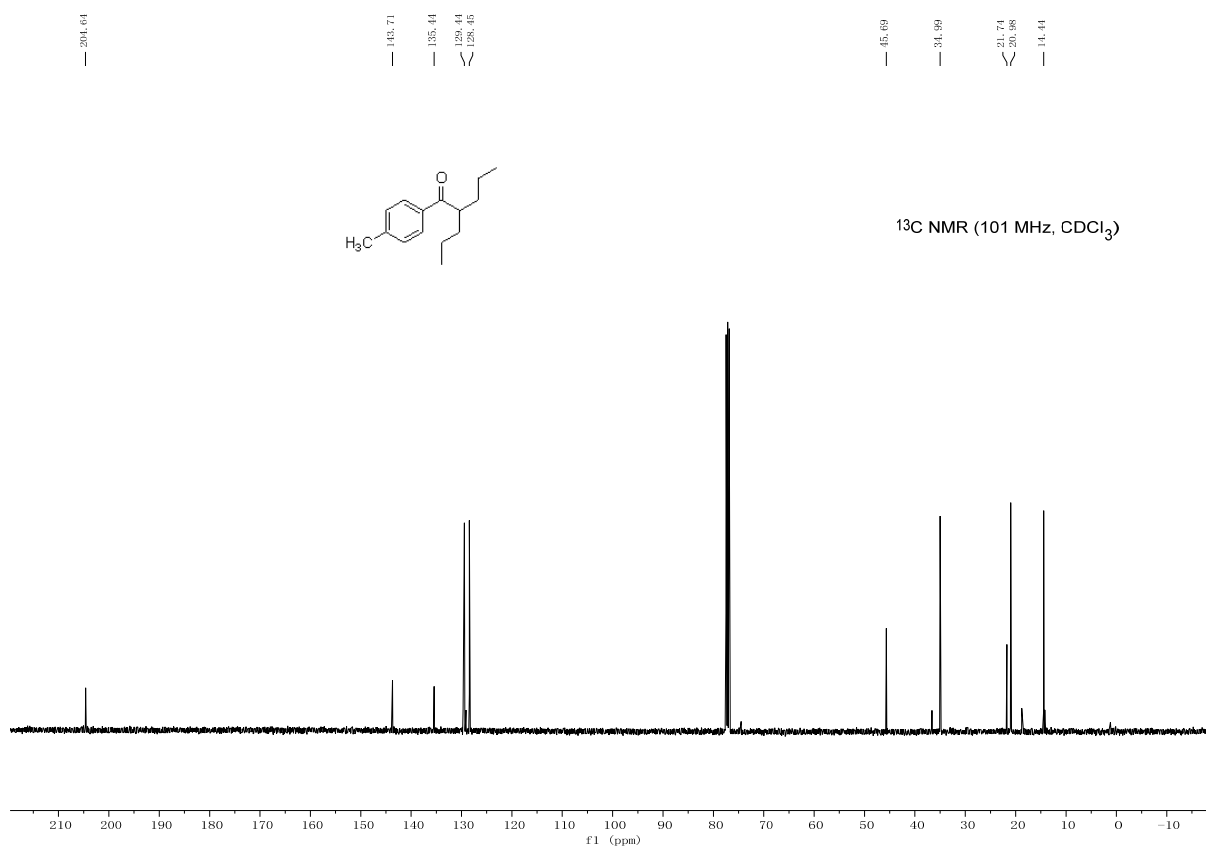



(29) 2-methyl-4-phenyl-1-(*p*-tolyl)butan-1-one (**3br**)

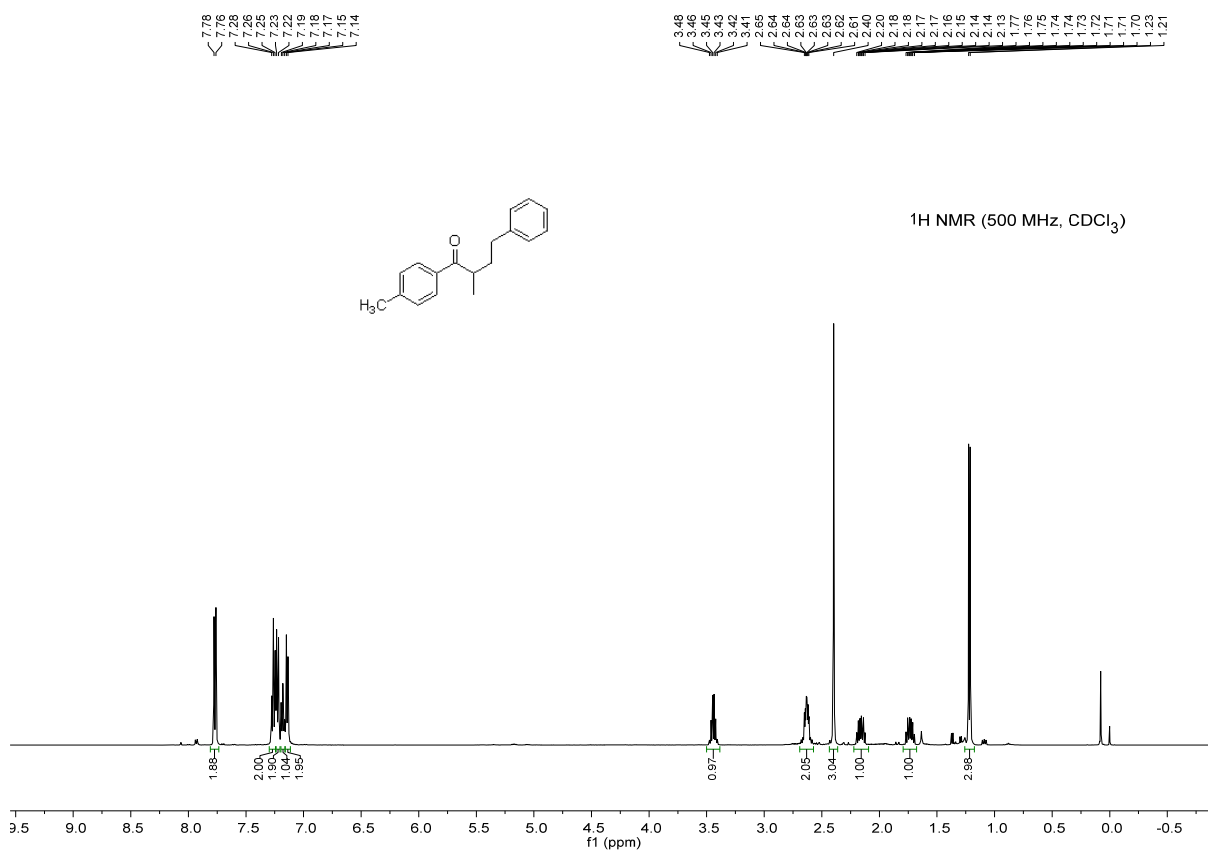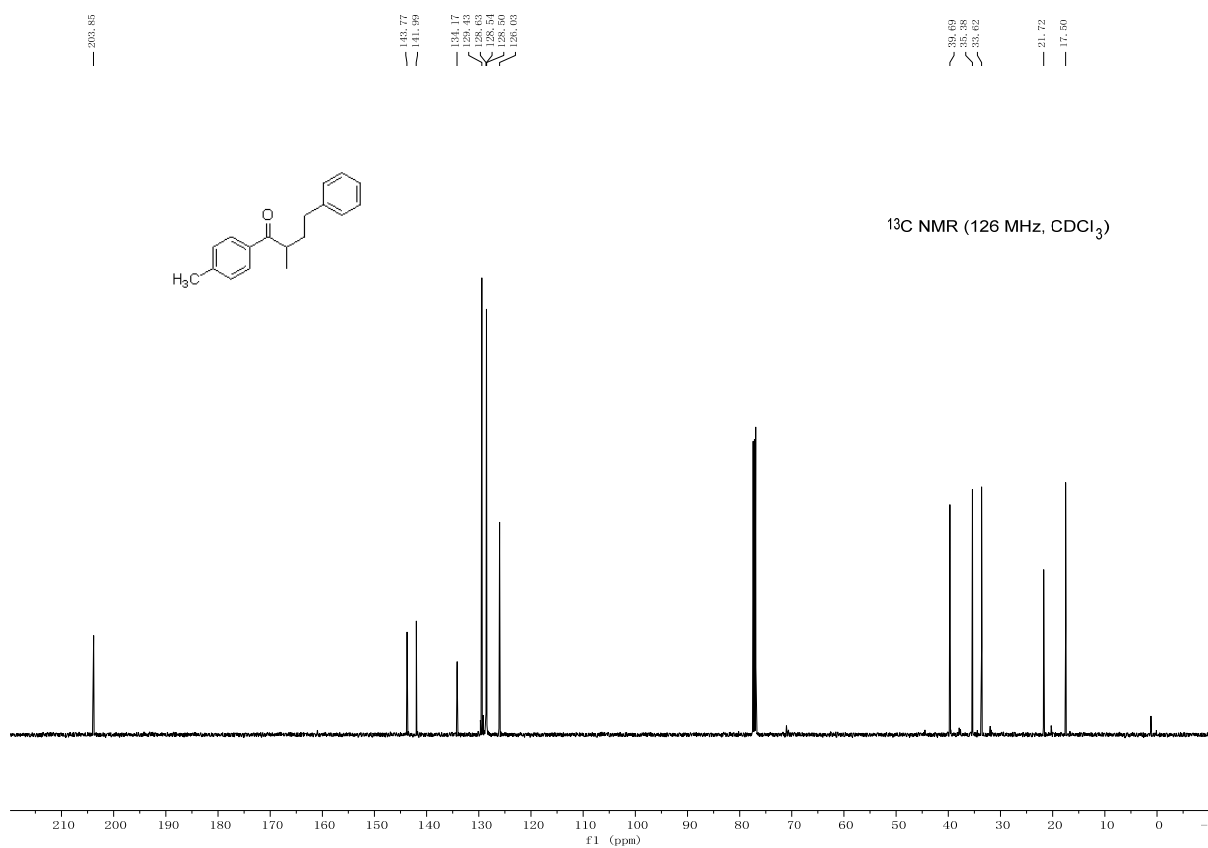

(30) (2,3-dihydro-1H-inden-2-yl)(*p*-tolyl)methanone (**3bs**)

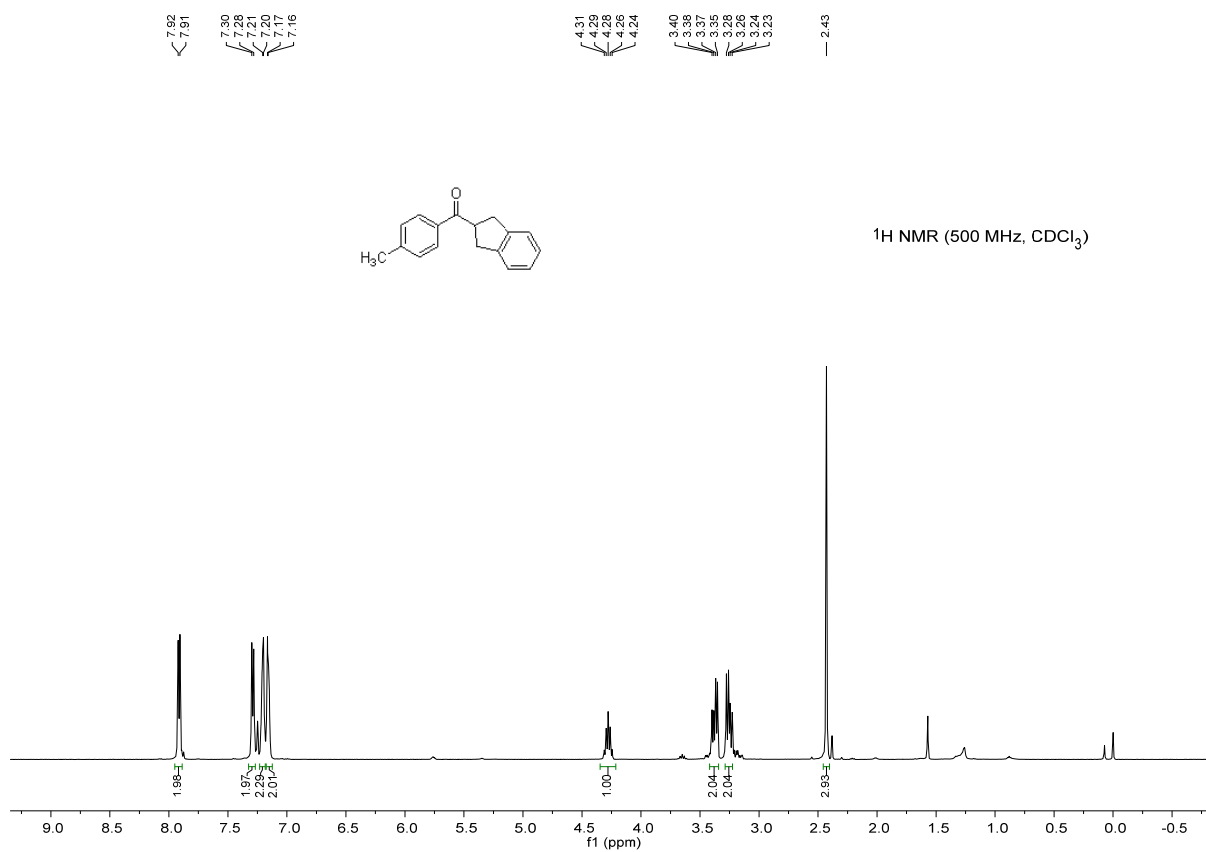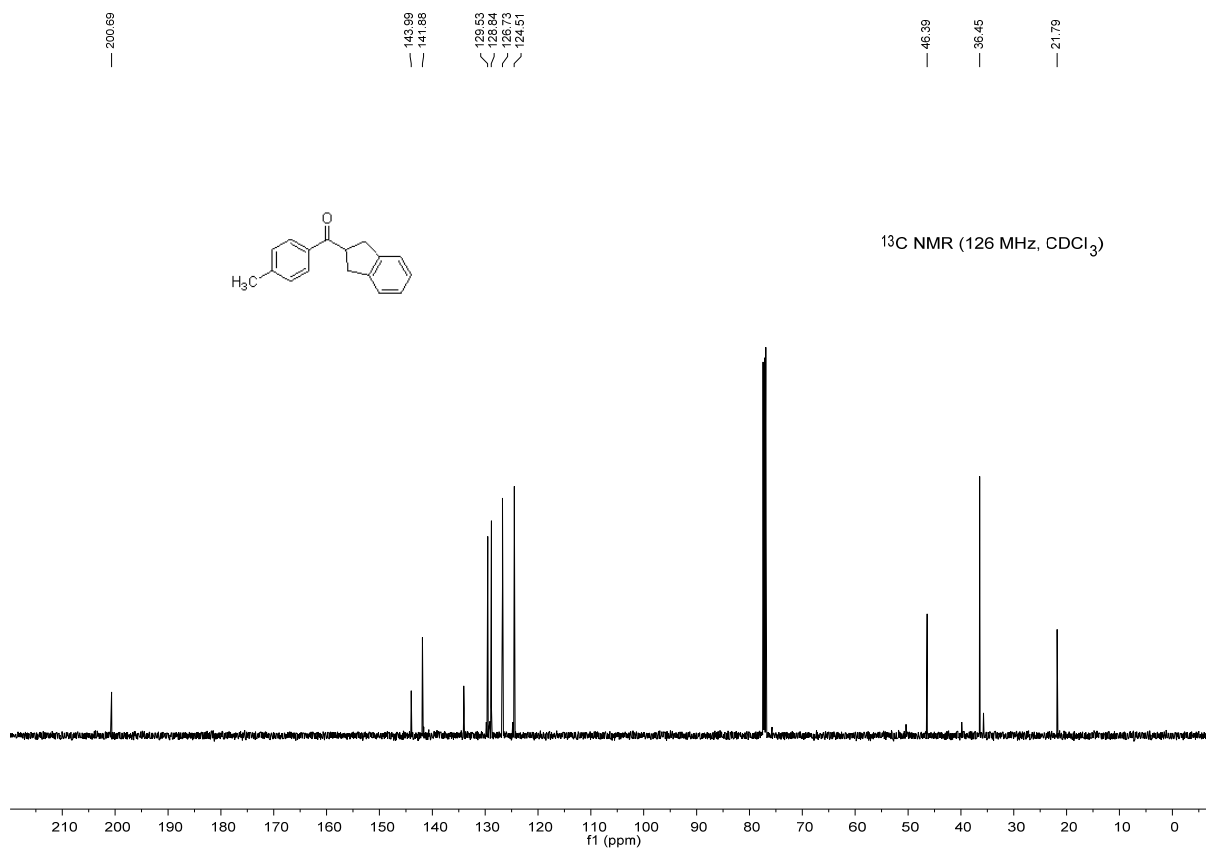

(31) (1,2,3,4-tetrahydronaphthalen-2-yl)(*p*-tolyl)methanone (**3bt**)

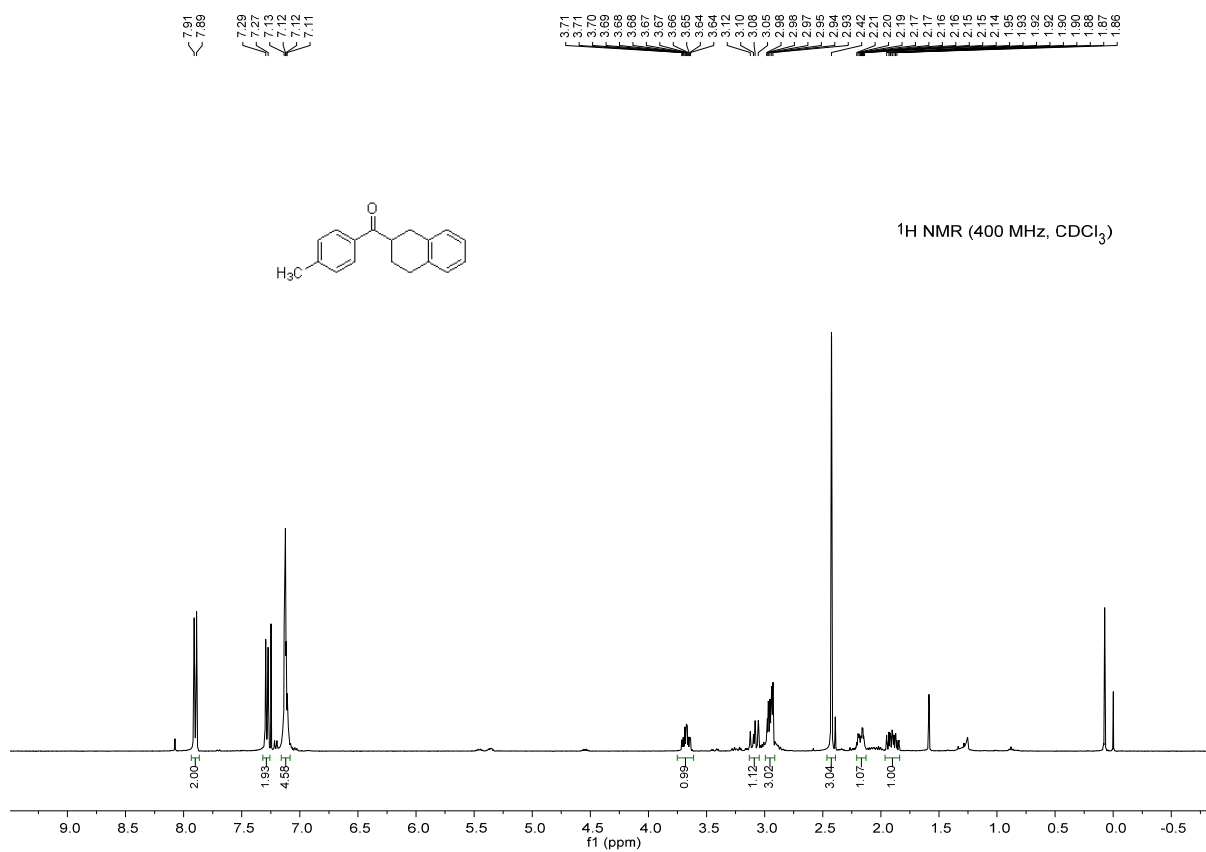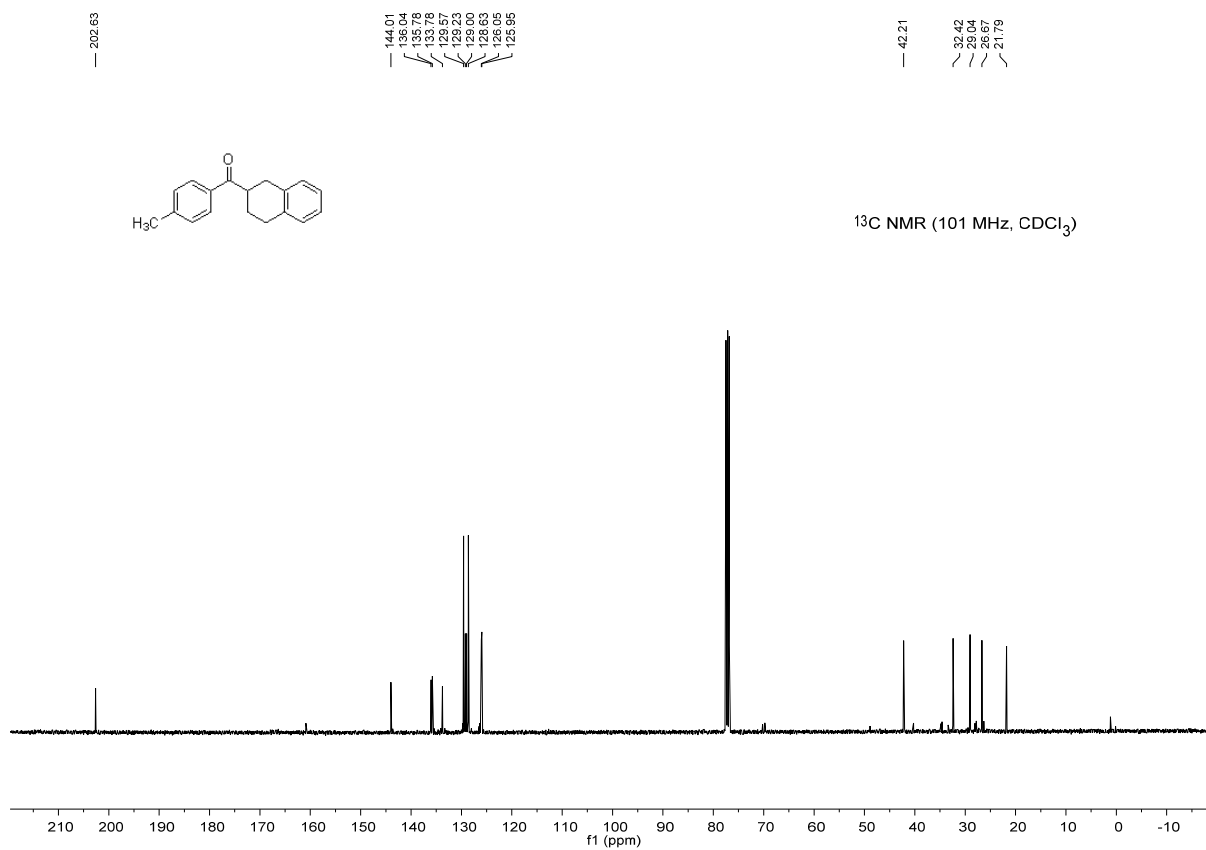

$^1\text{H}$  NMR spectrum of 1-(*p*-tolyl)pent-4-en-1-one (**3az**)

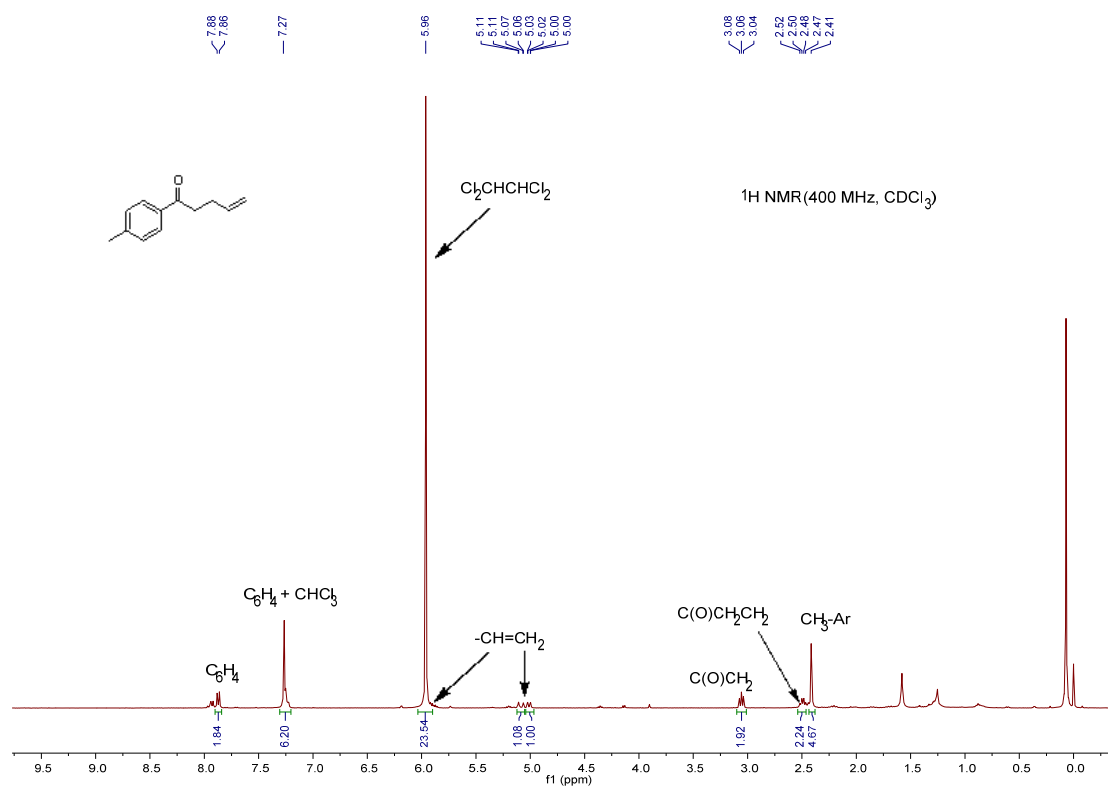

Supplement: d3ob00293d1.pdf [file d3ob00293d1.pdf]
